# Supplementary material
Source: PubMed Central journal article supplement (PMC4558696)
Supplement: supp_tpc.15.00010_TPC2015-00010-RAR1_Supplemental_Data_pdf.pdf [file supp_tpc.15.00010_TPC2015-00010-RAR1_Supplemental_Data_pdf.pdf]

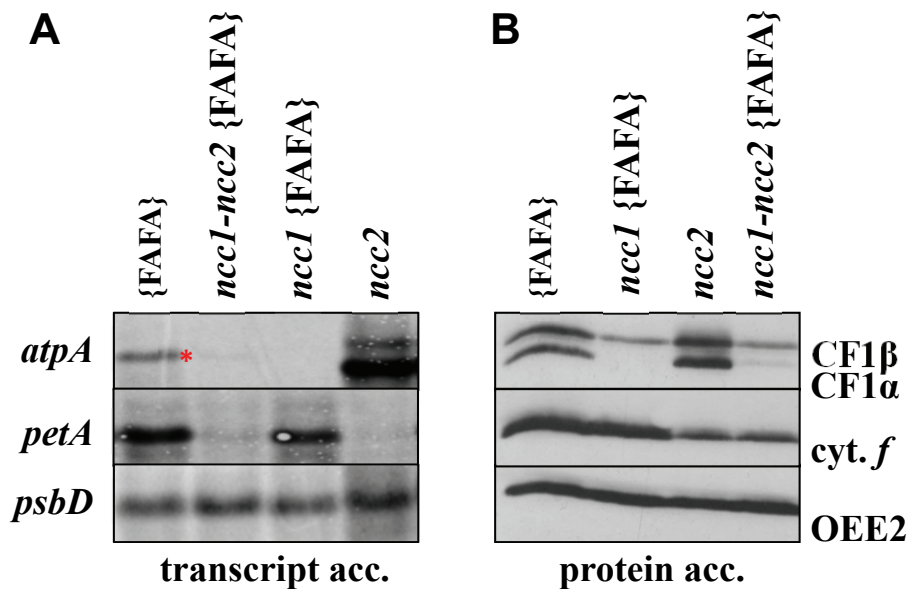

**Supplemental Figure 1: Phenotype of the double mutant *ncc1 ncc2* {FAFA}, descendant of the cross *ncc1 mt+* {FAFA} x *ncc2 mt-*, whose genome was sequenced.**

A. *petA* and *atpA* transcript accumulation in the parental strains *ncc2* and *ncc1* {FAFA}, in a {FAFA} transformant as a control and in the double mutant *ncc1 ncc2* {FAFA}, whose genome was sequenced to identify the mutations. *psbD* serves as loading control. The red asterisk points to the *FAFA* chimeric transcript, which migrates between the mono- and the di-cistronic *atpA* transcripts.

B. Accumulation of CF1-subunits  $\alpha$  and  $\beta$  (detected using an antibody raised against the whole CF1 complex (Lemaire and Wollman, 1989)) and of cytochrome *f* (OEE2 serves as loading control) in the same strains.

Supplemental Data. Boulouis et al. (2015). Plant Cell 10.1105/tpc.15.00010

```

NCL2      1
NCL36    1 MFQFAHG-----SAASGYGLGSRYN----PASANTGL---NLCPCGIPQTQPRAARTAGRLGRLAPSAT-----TGGVARGLACSSATSYPAAVLSGGGPHLAAAAPSATG AGG---
NCL37    1 MLQFAHP-----SPANGHGLGSSYTS---APASPLIWH---RMCPCGIPQTQPRAVRTAKRL---GPSAT-----TGGVARGLACSSATSGPAAVLSGGGPHLAAAAPAVTG AGG---
NCL38    1 MLQFAHP-----SPANGHGLGSSYTS---APASPLIWH---RMCPCGIPQTQPRAVRTAKRL---GPSAT-----TGGVARGLACSSATSGPAAVLSGGGPHLAAAAPAVTG AGG---
NCL23    1 -----MCPCGIPQTQPRAARTTGRL---GPSAT-----AGRVARGLACSSATSGPAAVLSSSSPHLAAATPAATW AGG---
NCC1     1 MLQFAHGSA----VG----LR-RSYN---APASAHIGL---ELWPCGIRLTQPRAARTAGRL---GPSAT-----AGRVARGLACSSATSGPAAVLSGGGPHLAAATPAATG AGG---
NCL24    1 MLQFTRASA----AAASGHDLGSRYS---APASALVWH---RVCPCGIPLTQPRAARTAGRL---GPSAT-----AGGVARGLACSSATSGPAAVLSSSSPHLAAATPAATW AGG---
NCL22    1 MLQFTRASA----AAASGHDLGSRYS---APASALVWH---RVCPCGIPLTQPRAARTAGRL---GPSAT-----AGGVARGLACSSATSGPAAVLSSSSPHLAAATPAATW AGG---
NCL25    1 ML-LFTRAS----AAASGHDLGCRYS---APASALIWH---RVCPSGIPQS---AARTAGRL---GPSAT-----AGGLARGLACSSATSGPAAVLSGGGPHLAAATPAATG AGG---
NCL17    1 MLQ--SGRG----TAASRHGLGSSYN---ASASVRTWH---RVGPCGIPLTQPRAARTAGRL---GPSAT-----AGGVARGLACSSATSGPAAVLSGGGPHLAAATPAATG AGG---
NCL21    1 MLQFAHGSAV-----GLRRSYN---APASAHIGL---ELCPFGIRLTQPRAARTAGRL---GPSAT-----AGGVARGLACSSATSGPAAVLSGGGPHLAAATPAATG AGG---
NCL19    1 MLQ--SGRG----TAASRHGLGSSYN---APASARTWH---RVGPCGIPLTQPRAARTAGRL---GPSAT-----AGGVARGLACSSATSGPAAVLSGGGPHLAAATPAATG AGG---
NCL20    1 MLQ--SGRG----TAASRHGLGSSYN---APASARTWH---RVGPCGIPLTQPRAARTAGRL---GPSAT-----AGGVARGLACSSATSGPAAVLSGGGPHLAAATPAATG AGG---
NCL15    1
NCL35    1
NCL14    1 ML--RAGRG----SAASGHGLGSSYN---APASARTWH---RMCPCGTPLTQPRAARTAGRL---GPSAT-----AGGLARGLTCSATSGPAAVLSGGGPHLAAATPAATG AGG---
NCL1     1 MLQFAHG-----SAASGHGLGSSYN---APASARTWH---RMCPCGIPLTQPRAARTAGRL---GPSAT-----TSGVARGLA--SATSGPAAVLSGGGPHLAAATPAATG AGG---
NCL16    1 -----MLQVAQPRAARTAGCL---GPSAT-----AGGVARGLA--SATSGPAAVLSGGGPHLAAATPAATG▼SGG---
NCL30    1 MLAQL-SRALILASATGARGQALGSLSSAIRNRCLEHHQHLLTTTEDGC-VVRSAPLGSRCVGLS---HPAAAGSEAPAAADHSSDLLQLPLPASHLAYTTSYSSVISGPAAAGLSGGGPHLAAAAPAAMF TPGAAA
NCL34    1 MLQFARASA-----AASGHGLGSSYTS---APVSAHTGLT---LRPCGIPLTQPRAARTAGRL---QPLAT-----AGGVARGLACSSATSGPAAVLSGGGPHLAAATPAATG AGG---
NCL33    1 MLQFARASA-----AASGHGLGSSYTS---APASAHTGLT---LRPCGIPLTQPRA---AGRL---HPPAT-----AGGVARGLACSSATSGPAAVLSGGGPHLAAATPAATG AGG---
NCL28    1 MLQFARASA-----AASGHGLGSSYTS---APASAHTGLT---LRPCGIPLTQPRA---AGRL---HPPAT-----AGGVARGLACSSATSGPAAVLSGGGPHLAAATPAATG AGG---
NCL29    1 MLQFARGSA-----AASRHGLGSSHTS---APVSAHTGLT---LRPCGIPLTQPRA---AGRL---HPPAT-----AGGVARGLACSSATSGPAAVLSGGGPHLAAATPAATG AGG---
NCL27    1 MLQFARGSA-----AASGHGLGSSYTS---APVSAHTGLT---LRPCGIPLTQPRA---AGRL---HPSAT-----AGGVARGLACSSATSGPAAVLSGGGPHLAAATPAATG AGG---
NCL31    1 MLQFARGSA-----AASRHGLGSSHTS---APVSAHTGLT---LRPCGIPLTQPRA---AGRL---HPSAT-----AGGVARGLACSSATSGPAAVLSGGGPHLAAATPAATG AGG---
NCL32    1 MLQFARASA-----TASRHGLGSSHTS---APVSAHTGLT---LRPCGIPLTQPRA---AGRL---HPSAT-----AGGVALGLACSSATSGPAAVLSGGGPHLAAATPAATG AGG---
NCL26    1 ML-TMR-----TRL-----FGNTRNSHGCFTV S-----
NCL3     1 M---RTGLL-----GR---PPL-----SAQSNSGHGY--G Y-----
NCC2     1 M---RT-----SR---PPL-----SAYSNSSRHGY--G Y-----
NCL5     1 MLAMRT-----SR---PPL-----SAYSNSSRHGY--G Y-----
NCL6     1
NCL13    1 MLVMRA-----S---SGLVAGSFGSGTCARSHSGHGY--C N-----
NCL10    1 MLALRV-----V---AGSPA-----GAHRSVHGC--S H-----
NCL7     1 MLALRV-----V---AGSPA-----GAHRSVHGC--S Q-----
NCL8     1
NCL9     1 MLALRV-----V---AGSPA-----GAHRSVHGC--S Q-----
NCL11    1 MLVMRA-----SGRFAGSPA-----GAHSHLSGHG--S H-----
NCL12    1
consensus 1 ml                                     p a                                     va ss sgp aa ls gp l t g

```

Supplemental fig. 2

Supplemental Data. Boulouis et al. (2015). Plant Cell 10.1105/tpc.15.00010

NCL2 1  
NCL36 100 --GLRQLLPLAAWARQTAQAPATASPAAAGARSCLLQPGRRQQVLAAGR--YGSDRSSDS---SS-----SSGRGYI-----SGSRS---SSDGGGRVGRGRAGGGRWAGGGG-RGTGRTGGG-GG  
NCL37 98 --GLQQVLPAAAWARQAAPAPATAAPAAAGARSHLLQPGRRQQVLAAGR--YSGGTSDDSSSDS-----SSRRGGI-----SGSRS---SSDGGGRAGRGRADGRWAGGGG-RGSGRTGGG-G-  
NCL38 98 --GLQQVLPAAAWARQAAPAPATAAPAAAGARSYLLQPGRRQQVLAAGR--YSGGTSDRSSSDS-----SSRRGGI-----SGSRS---SSDGGGRAGRGRADGGRWAGGGG-RGSGRAGGG-G-  
NCL23 67 --GLRQLLPLAAWARQAAPAPATAAPAAAGARSCLLQPGRRQQVLAAGR--YSGGSTSHRSIVSS-SDSSSSG-H-----GGI-----GSSRS---SSDGGGRAGRGRAGRGHFASVGG-RGSGRTGGG--G  
NCC1 94 --GLRQLLPLAAWARQAAPAPATAAPAAAGARSCLLQPGRRQQVLAAGR--YSGGTSHRSSGRS-SDNSSSG-H-----GGI-----SGSRS---SSDGGGRAGRGRADGGHWAGGSG-RGSGRTGGG--G  
NCL24 100 --GLRQLLPLAAWARQAAPAPATAAPAAAGARSCLLQPGRRQQVLAAGR--YSGGTSDDSSSDS-----SSRRGGI-----SGSRS---SSDGGGRAGRGRADGGRWAGGGG-RGSGRTGGG--G  
NCL22 100 --GLRQLLPLAAWARQAAPAPATAAPAAAGARSCLLQPGRRQQVLAAGR--YSGGTSDRSSGRS-SDNSSSG-R-----GGI-----SGSRS---SRDGRGRAGRGRADGGRWAGGGG-----R  
NCL25 96 --GLRQLLPLAAWARQAAPAPATAAPAAAGARSCLLQPGRRQQVLAAGR--YSGGTSHRSIDR---SSSSG-H-----GGI-----GSSRS---SSDAGGRAGGGRAGGGRWAGG-----RTGGA--G  
NCL17 97 --GLRQLLPLAAWARQAAPAPATAAPAAAGARSCLLQPGRRQQVLAAGR--YSGSSSSGRGSD---NSSSG-H-----GGI-----SGSRS---SSDGGGRAGRGRADGGRWAGGSG-RGSGRTGGG--G  
NCL21 94 --GLRQLLPLAAWARQAAPAPATAAPAAAGARSCLLQPGRRQQVLAAGR--YSGGTIDRSSGR-SSSSG-H-----GGI-----GSSRS---SSDAGGRAGGGRAGGGRWAGG-----RTGGA--G  
NCL19 97 --GLRQLLPLAAWARQAAPAPATAAPAAAGARSCLLQPGRRQQVLAAGR--YSGGTSHRSIDR---SSSSG-H-----GGI-----GSSRS---SSDAGGRAGGGRAGGGRWAGG-----RTGGA--G  
NCL20 97 --GLRQLLPLAAWARQAAPAPATAAPAAAGARSCLLQPGRRQQVLAAGR--YSGGTSHRSIDR---SSSSG-H-----GGI-----GSSRS---SSDAGGRAGGGRAGGGRWAGG-----RTGGA--G  
NCL15 1  
NCL35 1  
NCL14 97 --GLRQLLPLAAWARQAAPAPATAAPAAAGARSCLLQPGRRQQVLAAGR--YSGGTSHRSSGRS-SDSTSDS-SIDSSSGRSD-----SSNNDRSRGGHADRAGRGRAGGGRWAGGRTGGGSGRTGGG---  
NCL1 95 --GLRQLLPLAAWARQAAPAPATAAPAAAGARSCLLQPGRRQQVLAAGR--YSGGTSYTSSDRS-----SD-----SSNNDKGRGGHVEDRAGRGRAGGGRWAGGRTGGGSGRSGGG-GG  
NCL16 61 --GLRQLLPLTAWARQAAPAPATAAPAAAGARSCLLQPGRRQQVLAAGR--YSGGSTSKSSGRS-----SG-----SSNNDKGRGGHVEDRTGRGRAGGGRWAGGRTGGGSGRS-----  
NCL30 136 AAAYGSLPPLGW-----HAQPQVAAGVM---HSGTTGSASSGSS-GSS-----S-----SS-----SSSGEGDGGNGRSGG-----GRGSGRTGG  
NCL34 99 --GLLQLLPLAAWARQAAPAPATAAPAAAGARSCLLQPGRRQQVLAAGR--YSGGAIIDRSSGMS-SSS-----SSSRRDDI-----SGSRS---SSDGGGRAGRGRAGGGRWNGGRRG-----SGR  
NCL33 96 --GLRQLLPLAAWARQAAPAPATGAPAAAGARSCRLQPGRRQQVLAAGR--YSGSSSSGRG-----SDNSSSGHGGI-----SGSRS---SSDGGGRAGRWAGGGHWADGRTGGGSGMSAGD---  
NCL28 99 --GLRQLLPLAAWARQAAPAPAVAPAAAGARSCLLQPGRRQQVLAAGR--YSGGIIIDRSSGMS-SSSSSSSSSSSSSRRDDI-----SGSRS---SSDGGGKAGRGRAGGGRWNGGRRG-----SGR  
NCL29 96 --GLWQLLPLAAWARQAAPAPATAAPAAAGARSCLLQPGRRQQVLAAGR--YSGGIIIDRSSGMS-SSSSSS-SSSSSSSRRDDI-----SGSRS---SSDGGGKAGRGRAGGGRWNGGRRG-----SGR  
NCL27 96 --GLRQLLPLAAWARQAAPAPATAAPAAAGARSCLLQPGRRQQVLAAGR--YSGGIIIDRSSGRS-SDS-----SS-----SS-----SSDGGGRAGRGRAGGGRWAGGRTGGAGGRSSG---  
NCL31 96 --GLRQLLPLAAWARQAAPAPATAAPAAAGARSCLLQPGRRQQVLAAGR--YSGGIIIDRSSGMS-SSS-----SS-----SS-----SSDGGGRAGRGRAGGGRWAGRTGGAGGRSSGGDGR  
NCL32 96 --GLRQLLPLAAWARQAAPAPATGAPAAAGARSCRLQPGRRQQVLAAGR--YSGGS-----SS-----SS-----SSDGGGRAG-----RGR  
NCL26 23 -----HMLAVSKGPRPAGALL-----PKTAG-----PSS-----SVPRPSQRAGSAVAVLGGGSEL--FLVPVASRQ--LVQAAAAGGGAAGGEGGWGRSGGLGGGHAGRDSS  
NCL3 24 -----GYAVSQGPRPASRVL-----LPVRSGTTVPRAFAGPSAARVAAPAPALR---S-----SSTWSGSEAVLGGIRRLAPATPPTSRQ--VVQTAAGSGAAAGGANSGG-RGSGRG-YRSGGT  
NCC2 21 -----GSAAVSQGPRPASRGL-----LPVRSGTTVPRAFASPSAASARPVLLS---RSLSPR-SGSVPSVLGSGGRRPIAPAVPPPSSRQ--LEQAAAAGGGAGSS-----S-RGEGR--MGGRGR  
NCL5 24 -----GYAVSQGPRPASRVL-----LPVRSGTTVPRAFASPS--ARPALLES---GSLSPRRSGSVPTVLAVSGRRPIAPAVPPPSSRQ--LEQAAAAGGGAGSS-----S-RGEGR--MGGRGR  
NCL6 1  
NCL13 31 -----SSSARLQAPQACALR-----RLFGR-----SDSDPSSPRAAAATSVPAHNSSSSSPL---RVSTA AVLGG-----SSSRLGRS---VVQVAAGRGSAGGGRAGG-----S-  
NCL10 25 -----SLSARLQAPPACAFR-----RLFVYGMHRTAADTGPSSPRAAAATSVPALNSSSSSPL---RVSTAVVLCGS-----SSSRLGRP---IVQAAAGRGSAGGGRAGDG-----SR  
NCL7 25 -----SLSARLQAPPACAFR-----RLFVYGMHRTAADTGPSSPRAAAATSVPALNSSSSSPL---RVSTAVVLCGS-----SSSRLGRP---IVQAAAGRGSAGGGRAGDG-----SR  
NCL8 1  
NCL9 25 -----SLSARLQAPPACAFR-----RLFVYGMHRTAADTGPSSPRAAAATSVPALNSSSSSPL---RVSTAVVLCGS-----SSSRLGRP---IVQAAAGRGSAGGGRAGDG-----SR  
NCL11 28 -----RSPACLOAPRPVVTAM-----PAARGIAPSRAPASDPSSARAATAASLRARY--SPFSL---RGLMVAMRGG-----SSTRLARP---VVQAAAGRGSAGGGRGRGGGMAGG-----GRGG  
NCL12 1  
consensus 141 g l p aawar ap pa aa pgrraq qv aaag ygs g rs g agrg aggg gg  
MPGRL----QATLTATRGFL-----AQPQVQR--FVQTAGGRGSGGGGGRTGG-----GG

Supplemental Fig. 2A (continued)

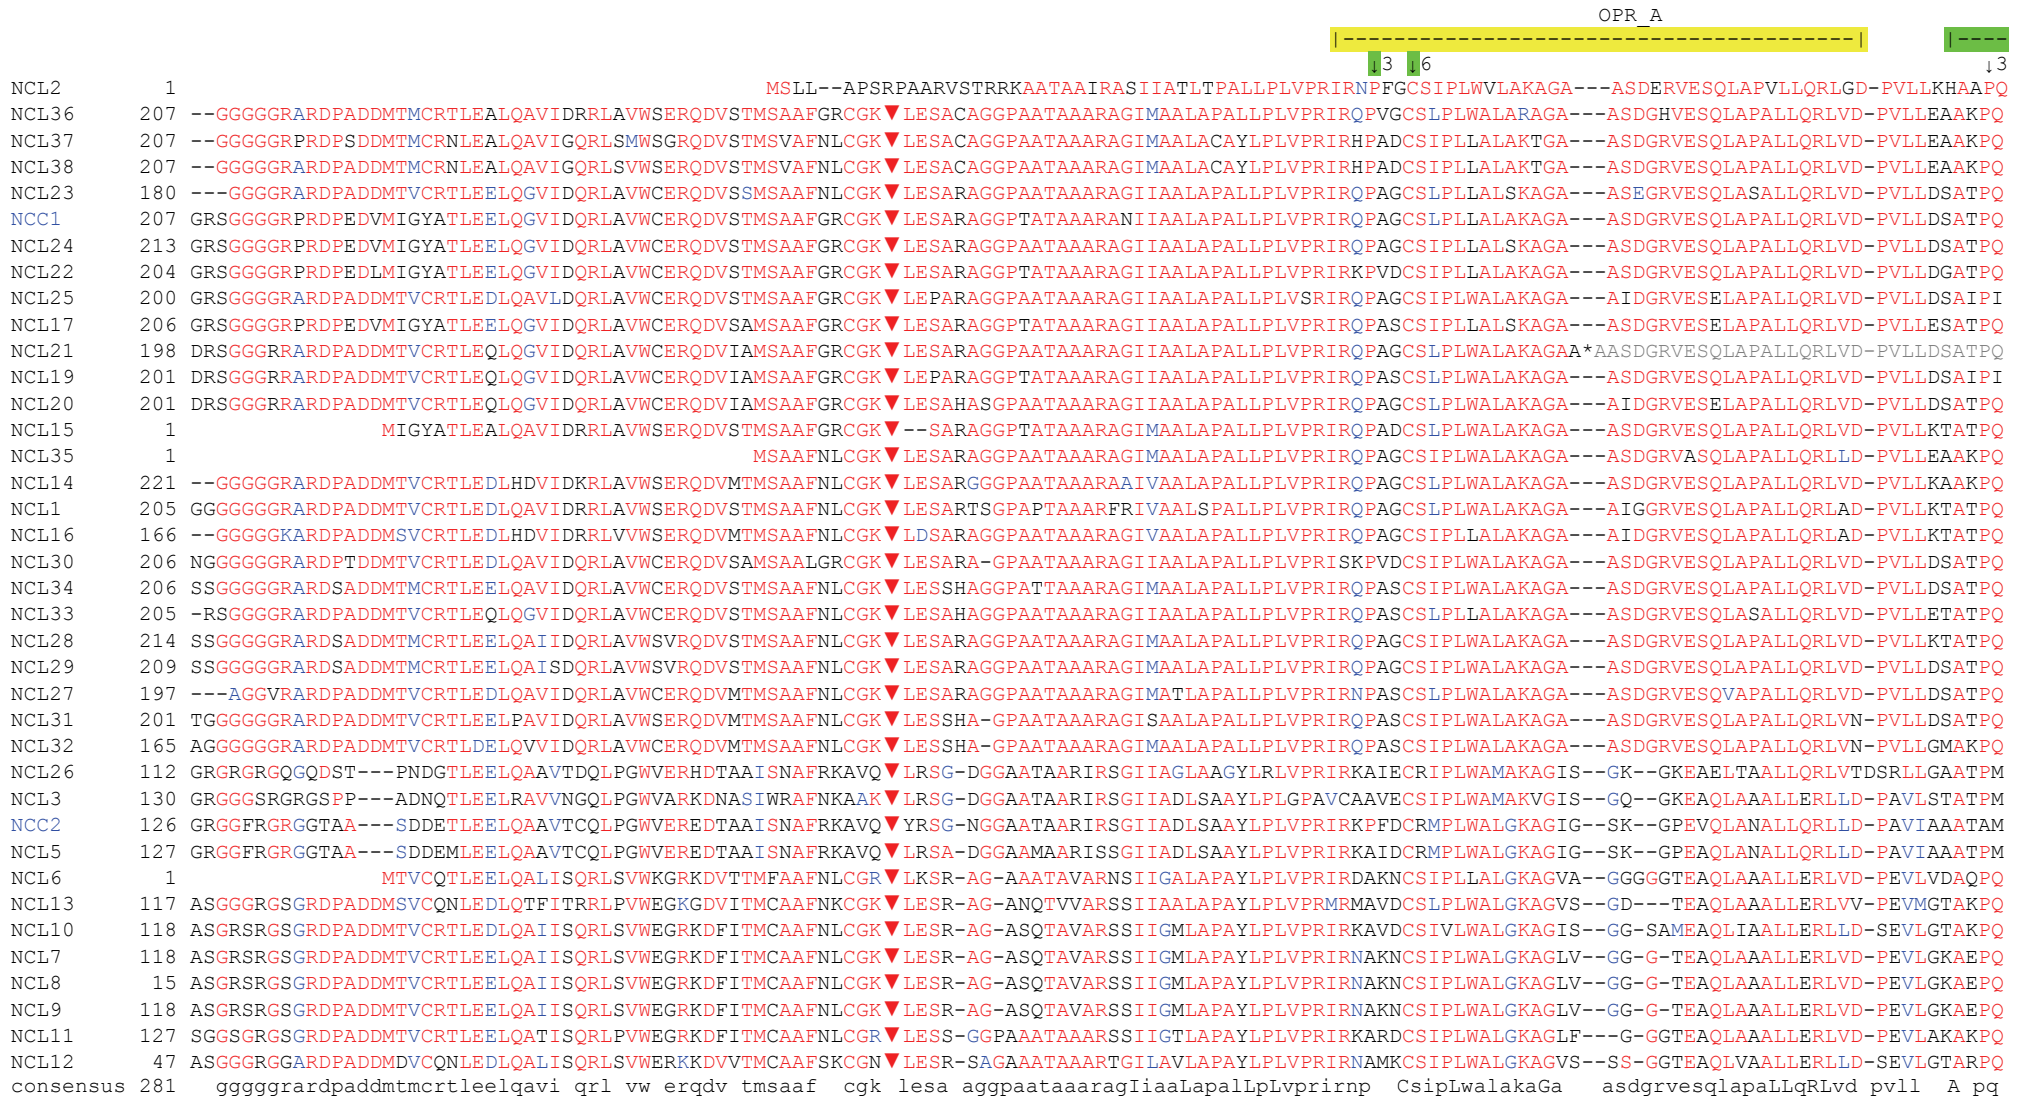

Supplemental Fig. 2A (continued)



Supplemental Data. Boulouis et al. (2015). Plant Cell 10.1105/tpc.15.00010

|           |     | OPR E...                                                         |  | ...OPR E                             |
|-----------|-----|------------------------------------------------------------------|--|--------------------------------------|
|           |     | -----                                                            |  | -----   -----                        |
|           |     | 6                                                                |  | 3 6                                  |
| NCL2      | 227 | ELFNILMALQQLP-----                                               |  | QIGRQQSELLAAVAAVDLQRDFAGYNSQDLSNSAW  |
| NCL36     | 477 | HLSNILLALEGL-----QLGGKQSELLAAVAAECVRRRLRTLKEAEAFIPQHLSNILLALEGL  |  | QLRGKQSELLASAVATEGVRRGFARFESQALSNSAW |
| NCL37     | 477 | ELSNILLALEGL-----QLGGTQSELLAAVAAECVRRRLRTLKEAQAFKPKQLSNILLALEGL  |  | QLRGKQSELLASAVAAEGMRRAFAGFKPQDFNSAAW |
| NCL38     | 477 | ELSNILLALEGLQLGGKQSELLAAVAAECVRRRLRTPKEAEAFKPKQELSNILLALEGL      |  | QLRGKQSELLASALAAEGMRRAFAGFKPQDFNSAW  |
| NCL23     | 450 | GLSNILLALEGL-----                                                |  | QLRGKQSELLTAAVAAEGVRRGFAGFKPQELNSAW  |
| NCC1      | 479 | HLSNILLALEGL-----                                                |  | QLRGKQSELLASAVAAEGVRRGFAGFNPQDLSNSAW |
| NCL24     | 485 | GLSNILLALEGL-----                                                |  | QLRGMQAEELAAVAAEGVRRGFAGFEPQHLSNSAW  |
| NCL22     | 476 | GLSNILLALEGL-----                                                |  | QLRGKQSELLASAVAAEGVRRGFAGFEPQHLSNSAW |
| NCL25     | 473 | GLSNILLALEGL-----                                                |  | QLRGMQAEELAAVAAEGMRRGFAGFKPQELNSAW   |
| NCL17     | 478 | HLSNILLALEGL-----QLGGKQSELLAAVAAECVRRRLRAPKEAEAFIPQHLSNILLALQGL  |  | QLRGKPSSELLADAVAAEGVQRGFAGFKPQELNSAW |
| NCL21     | 472 | DLSNILLALEGLQLGGKQSELLAAVAAECVRRRLRAPKEAEAFKPKQELSNILLALEGL      |  | QLGGKQSERLAAVAAEGVRRGFAGFKPQELNSAW   |
| NCL19     | 473 | HLSNILLALEGL-----QLGGKQSERLAAVAAVEAMRRGFAGCNPQELNSAW             |  |                                      |
| NCL20     | 473 | HLSNILLALEGL-----QLGGKQSERLAAVAAVEAMRRGFAGCNPQELNSAW             |  |                                      |
| NCL15     | 256 | HLSNILLALEGL-----QLRGMQAEELTAAVAAECVRRLGTPEKATAFIPQELSNILLALEGL  |  | QLRGKQSELLAAVAAEGVQRGFAGFNPQCLNSAW   |
| NCL35     | 229 | GLSNILLALEGL-----QLGGQSERLAAVAAEGVQRGFAGFNPQALSNSAW              |  |                                      |
| NCL14     | 491 | HLSNILLAMEGL-----QLRGMQAEELAAVAAECVRRRLRTPMGAEAFKPKQELSNILLALEGL |  | QLRGKQSELLAAVAAEGVRRGFAGFNPQCLNSAW   |
| NCL1      | 477 | DLSNILLALEGL-----QLRGKQSELLASAVAAECVRRGFAGFEPQHLSNSAW            |  |                                      |
| NCL16     |     |                                                                  |  |                                      |
| NCL30     | 477 | GLSNILLALEGL-----KLRGKQSRLLAAVAAECVRRGFAGFKPQHLSNSAW             |  |                                      |
| NCL34     | 478 | GLSNILLALEGL-----QLGGTQSERLAAVAAECVRRRLRARKEAEVFKPKQELSNILLALEGL |  | QLGGKQSERLAAVAAEGVRRGFAGFEPQHLSNTAW  |
| NCL33     | 476 | HLSNILLALEGL-----QLGGKQSELLAAVAAEGVRRNFAGFNPQALSNSAW             |  |                                      |
| NCL28     | 486 | ELSNILLALEGL-----QLGGKQSERLAAVAAEGVWRRGFAGFTPQDLSNSAW            |  |                                      |
| NCL29     | 482 | ELSNILLALEGL-----QLGSKQSERLAAVAAEGVWRRGFAGFTPQELNSAW             |  |                                      |
| NCL27     | 466 | ELSNILLALEGL-----QLGGKQSELLAAVAAEAMRRGFAGFNPQHLSNSAW             |  |                                      |
| NCL31     | 472 | GLSNILLALEGL-----QLGGTQSEQLAAVAAVEAMRRGFAGCNPQELNSAW             |  |                                      |
| NCL32     | 436 | GLSNILLALEGL-----QLGGTQSEQLAAVAAVEAMRRGFAGCNPQELNSAW             |  |                                      |
| NCL26     | 376 | HLSNILLALEGL-----QLGGKQAEEL-AAVATEDLRRGFSGYNDQDLTNSAW            |  |                                      |
| NCL3      | 393 | HLSNILLALEGL-----QLGREKAQLV-AAVAADGVRRGFAGFKPQELNSAW             |  |                                      |
| NCC2      | 389 | DLSNILLALEGL-----QLGSEQAQLV-SAVAAEDVRRGFTRYNSQDISNSTW            |  |                                      |
| NCL5      | 395 | HLSNILLALEGL-----QLGSDQAQLTV-AVAADVRRSLAGYVAQDISNSAW             |  |                                      |
| NCL6      | 259 | DLSTILLALEGL-----QLGGKQAEELV-AAVAADGVRRGFAGYGAQNVGNSAW           |  |                                      |
| NCL13     | 385 | HLSNILLALEGL-----QLGGKQAEELV-AAVAADGVRRGFAGYVAQDLSNSAW           |  |                                      |
| NCL10     | 388 | HLSNILLALEGL-----QLGGEQAEELVV-AVAADGVRRGFAGYVAQDLSNSAW           |  |                                      |
| NCL7      | 350 | QLSNILLALEGL-----QLCSEQAEELV-AVAEEDMRRGFDGYIAQDLSNSAW            |  |                                      |
| NCL8      | 247 | QLSNILLALEGL-----QLCSEQAEELVV-AVAADGVRRGFDGYIAQDLSNSAW           |  |                                      |
| NCL9      | 350 | QLSNILLALEGL-----QLCSEQAEELVV-AVAEEDMRRGFDGYIAQDLSNSAW           |  |                                      |
| NCL11     | 306 | ELSNVLLALEGL-----QLGGGQAGLVV-AVAADGVRRGFTGYVPQDLNSAW             |  |                                      |
| NCL12     | 227 | ELSNILLALEGL-----QLGGKQAEELV-AAVAADGVRRGFEGYVPQDLSNSGR           |  |                                      |
| consensus | 561 | lsnillalegl                                                      |  | ql g qse laavaaegvrrgfagy pqdlsnsaw  |

Supplemental Fig. 2A (continued)



|           |     | OPR J                                                                                           |                                                                                                                  |                                           |  |
|-----------|-----|-------------------------------------------------------------------------------------------------|------------------------------------------------------------------------------------------------------------------|-------------------------------------------|--|
|           |     | -----                                                                                           | -----                                                                                                            |                                           |  |
|           |     | ↓ 3                                                                                             | ↓ 6                                                                                                              |                                           |  |
| NCL2      | 409 | GPAGLAAAPLARALAEAAV-RRRKDL---                                                                   | TKGGLAQLWQARQELGNEV-EALTRGPDVQAAMEAAVAATQ-ATGSNPSTQEQAAKALLSLTQK-----                                            | GLLPVSVVWVETAVEGMLGRVDIVTDWSFGRMVAVEVDGP  |  |
| NCL36     | 704 | GPASPAATALAPALAREAV-RRREGP---                                                                   | QNGGLCQLWQARQELGGEVAEALARSPDLNAAMEAAVAAEW-ATKNSNSTSQEQVAEALRLLQK-----                                            | GRLPVSVTEVVVEGVLGRADIVAGWSGDGRRVAIEVDGP   |  |
| NCL37     | 704 | GPASPAIATALAPVLAAREA-RRREGF---                                                                  | QIEGLCQLWQARQELGGKVAEALARSPDLNAAMEAAVAER-ATKSTSTSQEQVAEALRLLQK-----                                              | GCLPIGFVQTEVVVEGVLGRADIVAGWSGDGRRVAIEVDGP |  |
| NCL38     | 751 | GPASPAATALASALAREAV-RRREGF---                                                                   | QIEELCQLWQVQELGGKVAEALARSPDLNAAMEAAVAER-ATKSTSTSQEQVAEALRLLQK-----                                               | GCLPIGFVQTEVVVEGVLGRADIVAGWSGDGRRVAIEVDGP |  |
| NCL23     | 631 | GPASPAASAVAPALAREAA-RRREGF---                                                                   | QTEALRQLWQAKHELGGVEALARSPDLNAAMEAAVAER-ATGSTSSLQEQVAEALQRLLRK-----                                               | ARLPVSVRTEVVVEGVLGRVDIVADWSGDGRRVAIEVDGP  |  |
| NCC1      | 660 | GPASPAAMAPALAREAA-RRREGF---                                                                     | QTEGLLQLWQAQHELGGVEALARSPDLNAEIAAAVAAVQ-ATGSTSSLQEQVAEALQRLLRK-----                                              | GRLPVSVRTEVVVEGVLGRVDIVADWSGDGRRVAIEVDGP  |  |
| NCL24     | 666 | VPASPAALALAPALTREAA-RRREGF---                                                                   | PTGALSQLWQAQHELGGVEALARSPDLNAAMEAAVSAKR-ATGSTSSLQEQVAEALQRLLRK-----                                              | GRLPVSVRMEVVVEGVLGRVDIVADWSGDGRRVAIEVDGP  |  |
| NCL22     | 657 | GPASPAALALAPALAREAA-RRCEEL---                                                                   | QAEALSQLWQAQHELGGVEALARSPDLNAAMEAAVAAKR-ATGSNTSRLQEQVAEALQRLLRK-----                                             | GRLPVSVRTEVVVEGVLGRVDIVADWSGDGRRVAIEVDGP  |  |
| NCL25     | 654 | GPASPAALALAPALAREAA-RRHEEF---                                                                   | QTEALSQLWQAQHELGGVEALARSPDLNAAMEAAVAER-VTGSNTSRLQEQVAEALQRLLRK-----                                              | GRLPVSVRTEVVVEGVLGRVDIVADWSGDGRRVAIEVDGP  |  |
| NCL17     | 705 | VPASPAALALAPALAREAV-RRREEL---                                                                   | QTEALSQLWQAQHELGGVEALARSPDLNAAMEAAVADER-ATGSNTSRLQEQVAETLQRLLRK-----                                             | GRLPVSVRTEVVVEGVLGRVDIVADWSGDGRRVAIEVDGP  |  |
| NCL21     | 745 | VPASPAALALAPALAREAV-HRIRDL---                                                                   | AGDDFRQLWQAQHELGGVEALARSPDLNAAMEAAVAQR-STSTSTSTQKQVAEALQRLLRK-----                                               | GRLPVSVRTEVVVEGVLGRVDIVADWSGDGRRVAIEVDGP  |  |
| NCL19     | 654 | VPASPAASALAPALVREAV-RRREEF---                                                                   | QTEELRQLWQAQHELGGVEALARSPDLNAAMEAAVSAKR-ATGSTSTSQEQVAEALQRLLRK-----                                              | GRLPVSVRMEVVVEGVLGRVDIVADWSGDGRRVAIEVDGP  |  |
| NCL20     | 654 | VPASPAASALAPALVREAV-RRREEF---                                                                   | QTEELRQLWQAQHELGGVEALARSPDLNAAMEAAVSAKR-ATGSTSTSQEQVAEALQRLLRK-----                                              | GRLPVSVRMEVVVEGVLGRVDIVADWSGDGRRVAIEVDGP  |  |
| NCL15     | 483 | GPASPAATLASALAREAA-RRREEF---                                                                    | QTEALSQLWQAQHELGGVEALARSPDLNAAMEAAVAER-ATSTSTSTQKQVAEALQRLLRK-----                                               | DLLPIVSVQTEAAVEGVLGRVDIVADWSGDGRRVAIEVDGP |  |
| NCL35     | 410 | VPASPAALALAPALAREAV-RRREQFVMSAEHLRQLWQAQHELGGVEALARSPDLNAAMEAAVAER-ATGSNTSSTQKQVAKALQRLLRK----- |                                                                                                                  | DLLPIVSLQTEPVVEGVLGRVDIVADWSGDGRRVAIEVDGP |  |
| NCL14     | 718 | GPASPAALALAPALALEAV-RRREEL---                                                                   | NGDGLRQLWQARQELGGEVAEALARSPDLNAAMEAAVAER-ATSTSTSTQKQVAEALQRLLRK-----                                             | DLLPIVSVQTEVVVEGVLGRVDIVAGWRDGRSVAIEVDGP  |  |
| NCL1      | 658 | GPASPAALALAPALAYEAV-RRREKL---                                                                   | NGDDFSQLWQARQELGGEVAEALARSPDLNAAMEAAVAER-ATSTSTSTSQEQVAEALQRLLRK-----                                            | DLLPIVSVQTEVVVEGVLGRVDIVADWRDGRVAIEVDGP   |  |
| NCL16     |     |                                                                                                 |                                                                                                                  |                                           |  |
| NCL30     | 658 | GPASPAASALAPALAREAV-RRRQEF---                                                                   | QTEGLLQLWQARQELGGEVAEALARSPDLNAAMEAAVAER-ATGLNTRSRLQEQVAEALQRLLRK-----                                           | GRLPVSVRTEVVVEGVLGRVDIVADWSGDGRRVAIEVDGP  |  |
| NCL34     | 705 | GPASPAASALAPALAREAV-RRREGF---                                                                   | QTEGLLQLWQAQQELGCEVAEALARSPDLNAAMEAVVAER-ATGSTSRLQKQVAEALQRLLRK-----                                             | GRLPVSVQTEVVVEGVLGRVDIVADWSGDGRRVAIEVDGP  |  |
| NCL33     | 657 | GPASPAALALAPALAREAA-RRRQGF---                                                                   | QTEELRQLWQARQELGGEVAEALARSPDLNATMEAAVAAKR-ATESNTRSRLQEQVAEALQRLLRK-----                                          | GRLPVLMQTEVVVEGVLGRVDIVADWSGDGRRVAIEVDGP  |  |
| NCL28     | 667 | GPASPAATLASALAREAA-RRREEF---                                                                    | QTEALSQLWQARQELGGEVAEALARSPDLNAAMEATAVAEAEW-ATESNTRSRLQEQVAEALQRLLRK-----                                        | GRLPVSVRTEVVVEGVLGRADMVADWSGDGRRVAIEVDGP  |  |
| NCL29     | 663 | VPASPAALALALALAYEAV-RRREEV---                                                                   | QTEELFQLWQAQQELGGEVAEALARSPDLNAAMEAAVATQR-ATVSTSTSQEQVAEALQRLLRK-----                                            | GRLPISVQTEVVVEGVLGRVDIVADWSGDGRRVAIEVDGP  |  |
| NCL27     | 647 | GPASPAALALAPALAREAV-RRREER---                                                                   | NGEYLCQLWQARQELGGEVAEALARSPDLNAEIAAAVAAKR-ATESTSTRTQEHVAEALRLLQK-----                                            | GRLPVIVQTEVVAEGVLGRADIVADWSGDGRRVAIEVDGP  |  |
| NCL31     | 653 | GPATPAAALALAPALAREAV-RWREEL---                                                                  | NGDGLRQLWQARQELGGEVAEALARSPDLNAEIAAAVAAKR-ATESNTRSRLQEQVAEALRLLQK-----                                           | GRLPVIVQTEVVAEGVLGRVDIVADWSGDGRRVAIEVDGP  |  |
| NCL32     | 617 | GPATPAAALALAPALAREAV-RWREEL---                                                                  | NGDGLRQLWQARQQLGGEVAEALARSPDLNAAMEAAVAER-ATGLNTRSRLQEQVAEALRLLQK-----                                            | GRLPVIVQTEVVAEGVLGRVDIVADWSGDGRRVAIEVDGP  |  |
| NCL26     | 556 | GPLSAGMQQLAVEVARDAA-GRWEFT--                                                                    | ATEDLAQMWAQQELGGEVAALGSGNGLQAAMDVVAARR-DNSKPLPDDHKQLLAALRRLEQHGGGATAGGLALESVQTVVMGVLAPLDAVVRVSDGRQVALELVGA       |                                           |  |
| NCL3      | 571 | GTSSPGMQQLAIQLARNAA-GRWEGLI---                                                                  | HEDLSQLWQAQQELGGEVAETLCGISSLQAAMDKSVETYR-QDTKRLSETHKQLLAALRRLEQHGGREAGGFVAVSVQAGVVAAPGVLAAVDAVVRVNDGRQVAVELAGA   |                                           |  |
| NCC2      | 568 | ETGSPAMQQLAMQLARDAA-IRWEFA---                                                                   | DEGLTQLWQAQQELGGEVAALRGNRSQAAMDKAVATYR-EDTKHLPDDKQLLAALRRLEQHGRETAAGGLSIQSVQADAVVPGVLPMAAVVGLSDGRQVAVEWIGL       |                                           |  |
| NCL5      | 572 | ETCSPDMRRLAIQLARDAA-SRWDDFT---                                                                  | IEELTQLWQAQQELGGEVAALRDSLSLQATMDAVVAARR-EETKPLHANQKQLIGTLRRLLEQHGRETAAGGLSIQSVQADAVVPGVLPMAAVVGLSDGRQVAVEWIGL    |                                           |  |
| NCL6      | 435 | GTSSPGMQQLAIELARDAA-IRWEGFT--                                                                   | AVAGLTQLWQAQRELGGVEAALGSGSPGLQAAMAATAVAERAAADVKKPPDNKQLLAALRRLEQQLITTTTEGPSIQSLQTVIILPGILAPVAAVVGLSDGQQAQAVELVGL |                                           |  |
| NCL13     | 561 | NTCSPGMQQLAVQLARNAAAGRRWKGFT---                                                                 | DDGLRQLWQAQQELGGEVAALGSSPGLQAAMDKSVETYR-QDTKRLSETHKQLLAALRRLE--GLATAGGLAVQSVQTVVAPGVLPVDAVVRVSDGRQVAVEWTV        |                                           |  |
| NCL10     | 567 | GTYSFDMQQLSIQLAREAV-SRWEGFT---                                                                  | TENLNQLWQAQQELGGEVAALGSSPGLQAAMAATAVTER-ENAKPSTDIQKQVVAALRRLEQHGGREAGGLAVVSVQTVVAPGVLAPVDAVVRVSDGQQAQAVELVGL     |                                           |  |
| NCL7      | 529 | GTYSFDMQQLSIQLAREAV-SRWEGFT---                                                                  | TEHLKQLWQAQQELGGEVAALGSGSGLQAAMAATAVTER-EDAKPSTDTQKQVVAALRRLEQ-QGLKAAGGLAVQSLQTVVAPGVLPVDAVVRVSDGQQAQAVELVGL     |                                           |  |
| NCL8      | 426 | GTYSFDMQQLSIQLAREAV-SRWEGFT---                                                                  | TEHLKQLWQAQQELGGEVAALGSGSGLQAAMAATAVTER-EDAKPSTDTQKQVVAALRRLEQ-QGLKAAGGLAVQSLQTVVAPGVLPVDAVVRVSDGQQAQAVELVGL     |                                           |  |
| NCL9      | 529 | GTYSFDMQQLSIQLAREAV-SRWEGFT---                                                                  | TEHLKQLWQAQQELGGEVAALGSGSGLQAAMAATAVTER-EDAKPSTDTQKQVVAALRRLEQ-QGLKAAGGLAVQSLQTVVAPGVLPVDAVVRVSDGQQAQAVELVGL     |                                           |  |
| NCL11     | 484 | GTSSPGMQQLAVQLARDAA-GRWEGFS---                                                                  | GEHRQLWQAQQELGGEVAALCSPLQAAMAATAVTER-EDAKPSTDIQKQVVAALRRLEQHGGREAGGLAVRQTVGFAPGVLPVDAVVRVSDGRQVAVELVGL           |                                           |  |
| NCL12     |     |                                                                                                 |                                                                                                                  |                                           |  |
| consensus | 841 | gpaspaa la alarea rrre                                                                          | e l qlwqaqqelggevaealarspdlaameaavaa r at s ts q qvaeal rllqk                                                    | g lpivsvqtevvvegvlgrvdiva wsdgrrvaievdgp  |  |

Supplemental Fig. 2A (continued)





Supplemental Data. Boulouis et al. (2015). Plant Cell 10.1105/tpc.15.00010

NCL2  
NCL36 953 RRKAPKQEEAAGSGG-AGGASGATATA-----AGAELVAPAGQRQAVEAQRLPNSGAGGGGAGEGGDGTPLAPQPPPPQ-RQR-----VSAPRARRNSSQSRSRSSQAGSPLPPP-PSFVKAPPPEQVQ--AAAPP  
NCL37 955 RRKTFKQEA-PGGGG-AGEASGATAAA-----AGAELAAPAGQRQAEQAQLPSSGAGGGGAGEGGDGTPLAPQPPPPQ-RQR-----VSAPRARYSSSQSRSRSSQAGSPSPAP-P-PVEAPPPEQVQ--AAAPP  
NCL38 1000 RRKTFKQEA-AGGGG-AGGASGATAAA-----AGAELAAPAGQRQAEQAQLPSSGAGGGGAGEGGDGTPLAPQPPPPQ-RQR-----VSAPRARYSSSQSRSRSSQAGSPSPAP-P--VKAPPPEQVQAQAAAPP  
NCL23 879 RGKAPK-QEAVDGGG-AGGASNATAAAA-TVAVAGAESVAPAGQQQAEESHQLPNIAGGGGAGEGGEDGTPLAPQPPPPQ-QQH-----VSAPRARRSSSQSRSRSSQAGSPSPAPP-PPPVEAPPPEQM--AAAPP  
NCL1 906 RRKALK-QEAAAGGG-AGGASNATAAAA-TVAVAGAESVAPAWQQPVEKAQRLPSSGAGGGGAGEGGEDGASLAPQPPPPQ-QQH-----VSAPRARRSSSQSRSRSS\*  
NCL24 918 RRKAPKQEEAAGGG-AGGSDATAAAV-AAGVAGAESVAPAWQQPVEKAQRLPSSGAGGGGAGEGGEDGASLAPQPPPTQ-QQR-----VSAPRARRSSSQSRSRSSQAGLPAAPAPPPSVKAPPLEQTR--QLNPG  
NCL22 908 RKKAPM-QEAAGGG-AGGASGATATA-TI-PAEAKVVAPALQQQAEESHQLPNIAGGGGAGEGGDGTPLAPQPPPPQ-QQR-----VSAPRARRSSSQSRSRSSQAGSPSPPPPPPPVQAPPPEQM--VAAPP  
NCL25 900 RRTARK-QEAAGGG-AGEASGATAAAR-TV-RAEAEVAPARQQSAEKAQRLPSSGAGGGGAGEGGNGTPLAPQPPPTQ-QQR-----VSAPRARRSSSQSRSRSSQSGSP--PP-APPVEAPPPEQT--AAAQS  
NCL17 956 RRKAPK-QEAVGGG-AGGASATAAAA-TI-PAEAKVVAPALQQQAEESHQLPSSGAGGGGAGEGGDGTPLALQPPPPQ-QQH-----VSAPRARRSSSQSRSRSSQAGSPSPAPP-PPPFAPPPEQVQ--AAAPP  
NCL21 1002 RRKAPK-QEAVGGG-AGGASATAAAA-TI-PAEAKVVAPALQQQAEESHQLPSSGAGGGGAGEGGDGTPLALQPPPPQ-QQH-----VSAPRARRSSSQSRSRSSQAGSPSPAPP-PPPFAPPPEQVQ--AAAPP  
NCL19 901 RRKAPK-QEAAGGG-AGEASGATAAAR-TV-PAEAEVAPARQQSAEKAQRLPSSGAGGGGAGEGGNGTPLAPQPPPPQ-QQR-----VSAPRARRSSSQSRSRSSQAGSPS--P-APPVEAPPPEQVQ--AAAPP  
NCL20  
NCL15 738 RRKAPKQEAAGGG-AGGSDATVDAA--TVP-PAEAEVAPARQQQAEESQRLPISGAGGGAGEDGGDGLAPQPPPPQQRPR-----VSAPRARRSSSQSHSSSSSSQA--GSPPPPSVEAPPPEQVQ--AAAPP  
NCL35 662 RRTAPKQEAAGGG-AGGSDAATAAATAAAGAKSVAPAWQQQAEQAQLPSS---GGAGEGGDGLAPQPPPPQ-QPR-----VSAPTRSSSRQS\*  
NCL14 964 RRKARKQEVACGG-AGEASDATVAAA--TVP-PAEAEVAPAGQQQETVQRLPNSGAGGGGAGEGGDRAPLAPQPPPPQ-QPR-----VSAPRARRSSRQSPSRS---IQ--AGSPPPSVEAPPPEQM--AAAPP  
NCL1 904 RRTA-PKQEAAGGG-AGEASDATVAAR--TVP-PAEAEVAPAGQQQETVQRLPSSGAGGGGAGEGGDGLAPQPPPPQ-QPR-----VSAPTRSSSRQSQRG---VQ--AGLPAAPSVEAPPPEQM--AAAPP  
NCL16  
NCL30 904 RRKAPKQDLQHDATCDAPSASGAPAE-----VAEVA-----TSG---GP-RPATAGADVASAPRQQQRQRL--QQQPTRPEPEAVAAV-GRRRRPAK---EPRPQQQTRPPPQNRKRAASAN  
NCL34 958 RRKARKQDLQHNATFDTPSASGAPAE-----VAEVA-----TSG---GL-RPAAAGADVAPAPRQQQRQ--HQQPTRPEPEAVAAV-SRRRRPAAN---EPRPQQ-QQRPPPQNRKRAASAN  
NCL33 903 RRTARKQDLQHDATCDTPSASGAPAE-----AVPEVA-----TSG---GL-RPAAAGADVAPAPRQQQRQ--HQQPTRPEPEAVAAV-SRRRRPAAN---EPRPQQ-QQRPPPQNRKRAASAN  
NCL28 912 RRKAPKQDLQHDATCDAPSASGAPAE-----VAEVA-----TSG---GL-RPAAAGADVAPAPRQQQRQ--LQQPSRPEPEAVAVAV-GSCSRPAAN---EPRPQQ-QTRPPPQNRKRAASAN  
NCL29 909 RRTAPKQDLQHDATCDAPSASGAPAE-----VAEVA-----TSG---GL-RPAAAGADVAPAPRQQQRQ--RQQQPSMPEPEAMAAV-GRRRRPAAN---EPRPQQQTRPPPQNRKRAASAN  
NCL27 896 RRTARKQDLQHDATCDAPSASGAPAE-----VAEVA-----TSG---GP-RPATAGADVAPAPRQQQR--HQQPTRPEPEAVAAV-GRRRRPAK---EPRPQQQERPPPQNRKRAAFAN  
NCL31 899 RRKAPKQDLQHDATFDAPSASGAPAE-----VAEVT-----ASG---GS-RPAAAGADVAPAPRQQQRQRLQQQQPSRPEPEAVAAV-GRRRRPAK---EPRPQQQERPPPQNRKRAASAN  
NCL32 863 RRKAPKQDLQHDATCDAPSASGAPAE-----VAEVA-----TSG---GP-RPAAAGADVAPAPRQQQRQ--RQLQQPSRPEPEAVAAV-GRRRRPAK---DPQPQQQTRPPPQNRKRAASAN  
NCL26 791 R-PPRR-V\*  
NCL3 831 R-SPRR-V\*  
NCC2 826 R-PPRR-RV\*  
NCL5 826 R-PPRR-RV\*  
NCL6  
NCL13 806 R-PARR-PEGGGGG\*  
NCL10 814 R-PARR-PEGGGGGGSGRGR\*  
NCL7 777 R-PARR-PEGGGGRRRVGGS--KRTVGLRS\*  
NCL8 674 R-PARR-PEGGDGGGGGGGSKRTVVGLRS\*  
NCL9 777 R-PARR-PEGGDGGGGGGGSKRTVVGLRS\*  
NCL11 724 R-PARR-PEGGGGGGSGRGR\*  
NCL12  
consensus r a k g a s a a g g l a p q

Supplemental Fig. 2A (continued)

Supplemental Data. Boulouis et al. (2015). Plant Cell 10.1105/tpc.15.00010

NCL2  
NCL36 1075 RRAAGEKRTERKAAAAPAGGGG--GGGGSDPGAVVPAAVSEKQVAVVAGEEGSTAAVKGGD--GGGSGDGGLPAGSRRRRAVGTGRRRAASSSLAAATEQMRLEQ\*  
NCL37 1075 RRAAGGKRTERKAAAAPADGGG--GGGGTDPGAVVPAAVSEKQVAVVAGEEGSTAAVKGGD--GGGSGGGGLPAGSRRRRAVGTGRRRAASSSLAAASEQMRLEQ\*  
NCL38 1121 RRAAGGKQTV---AVDPAAGGGG--GGGGTDPGAVVPAAVSEKQVAVVAGEEDSSAAVRGGD--GGGSGGGGLPAGSRRRRAVGTGRRRAASSSLAAASEQMRLEQ\*  
NCL23 1004 RRAAGGKRTERKAAAATAAGGGG--GGGGSDPGAVVPAAVSEKRLSVVAGEADSSAAVECGGGH----GSGGGLLAGSRRKRAVGTGRRAAQKPSSE\*  
NCC1  
NCL24 1045 GPRVGSGLSGKQ-----RRPRQQAAVAAAAAVTPGRWWFRPRSLRSDS-----RWWPGRTRRQQL\*  
NCL22 1033 RRAAGGKWTERKAAAAPAGGGG--GGGGSDPGAVLVPAAVSEKR\*  
NCL25 1022 RRAAGGKRTERKAGVAPAAGDG---GGGGSDPGAVVPAAVSEKQVAVVAGEADSLAAAVECGGG--GDGSGNGGGLLAGSRRGQAVGTGRRAAQKPSSE\*  
NCL17 1080 RRAAGGKRTERKAAAAPAGGGGGGGGGSDSGAVVPAAVSEKRLSVVAGEADSSAAVECGGGGGDGS GGGGLPAGSRRGQAVGTGRRAAQKPCSIE\*  
NCL21 1126 RRAAGGKRTERKAAAAPAGGGG--GGGGSDSGAVVPAAVSEKR  
NCL19 1023 RRAAGGKRTERKAAAAPAGGGG---GGGGSDPGAVVPAAVSEKRLSVVAGEADSSAAVECGGGG---DGS GGLPAGSRRGQAVGTGRRAAQKPCSIE\*  
NCL20  
NCL15 863 RRAAGGKRTERKAAAAPAGGGG---GGSDPGAVVPAAVSENQVAVVAGEEGSTVAAVAGGG--GGGSGGGGLPAGSRRRRAVGTGRRAAQKSSSSV\*  
NCL35  
NCL14 1085 RRTAGGKRTVRKAAAAPAAG-----GGSDPEAVVPAAVSEKQAAVVAGEEGSTLADVEGGG--SGSGRGGGRRR-----RAV-----GPAGVRPRQA\*  
NCL1 1024 RRAAGGKRTERKAAAAPAGGGG--GGGGSGPGAVVPAVTVSENQVAVVAGEEGSTAADVEGGG--GGGSGGAGACP-----RAAGGGRRGPAGVQPRSVPGTSE\*  
NCL16  
NCL30 1013 A-----HAAAAAAAAA\*  
NCL34 1065 A-----DAAAAA\*  
NCL33  
NCL28 1019 A-----HAAAAAAAAA\*  
NCL29 1018 A-----HAAAAAAAAA\*  
NCL27 1001 A-----HAAAAAAAAA\*  
NCL31 1010 A-----HAAAAA\*  
NCL32 973 A-----HAAAAA\*  
NCL26  
NCL3  
NCC2  
NCL5  
NCL6  
NCL13  
NCL10  
NCL7  
NCL8  
NCL9  
NCL11  
NCL12

Supplemental Fig. 2A (continued)

## B)

```

      ↓ ↓
1      irnpaXCsipLwalakaga---asdgrvesqlapallqrlv
2      XaXpqXLanalYalgKlre---dqqqrgsgwdptssphlXa
3      gfXXqXvsnslwacaklgy--XrdXselllplaeaaaalaX
4      dmnaqXlXnslwaleXlgctgpafraXleXlXcgXalrXlrt
5      afkpqXlSnillaleglqlgg-XqXellaXavaaegvrrgf
6      gyXpqdlsnsawalakmggy---agXXXXaXeqXXwyaav
7      XaXpQawanllyalalvr---hqpppalldgaaaamqr---
8      XgXaqXcantlwalavl----qlrhagleaavcgrlgellr
9      slXXqXlcnslwalavlagggg-paspaaXXlaXalareaX
10     XeXlXqlwqaqqelggevaealarspdlXaameaavaaXra

Cons .  xFXpQXLsNlLWAlAKLg-xxxxPppxwLxalaxaaaarlp
        a   a s y c   r-   d l   la

```

**Supplemental Figure 2: Alignment of NCCL proteins.**

A) Alignment was done with the clustal $\omega$  software, and manually edited to improve alignment. It was edited with BoxShade (rtf old option: [http://www.ch.embnet.org/software/BOX\\_form.html](http://www.ch.embnet.org/software/BOX_form.html)). Residues conserved in more than 60 % of the sequences (>22 out of 36) are written in red, conservative substitutions are indicated by blue letters, while amino acids at variable positions or differing from the consensus are written in black. Residues written in grey are those that show similarity to other NCL proteins but are not translated because of premature Stop codons. The positions of the OPR repeats and of the RAP domain are shown above the sequence. Variations in the number of the OPR repeats mostly result from intra-protein repeats deletions (e.g. OPR\_C in NCL7, NCL8 and NCL9; OPR\_B and OPR\_C in NCL11 and NCL12) or duplications (see the region of OPR\_E in NCL14, 15, 17, 34, 36-38, with NCL38 showing two identical copies of the repeat AFKPQELSNILLALEGLQLGGKQSELLAAVAEAECVRRRLR). Arrows point to positions 3 and 6 within the OPR repeats, which show a higher variability compared to the rest of the repeat, suggesting that these positions are under diversifying selection. Residues mutated in NCC1 and NCC2 are black-boxed and written in white. Red arrowheads point to the position of introns.

B) Consensus sequences for each OPR repeat, retrieved from panel A), were aligned. Residues in capital letters are found at that position in all NCL proteins, while positions less conserved (a same amino acid was not found in, at least, 23 out of 36 NCCL proteins) are indicated by a red X. Residues fitting the OPR consensus, shown below the alignment, are shaded in grey. Arrows point to position 3 and 6 that show the highest variability within the OPR repeats, written in red in the consensus.

**The RAP domain may show endonucleolytic activity.**

The structural modelling of the RAP domain of NCC1 and NCC2 by the I-TASSER software (Zhang, 2008) used four endonucleases as major templates. Two of them (3r3p, the Catalytic Domain of Homing Endonuclease I-Bth0305I (Taylor et al., 2011) and 3hrl, a putative endonuclease-like protein from *Neisseria gonorrhoeae*) are annotated as carrying a DUF559 domain, also found in many bacterial OPR-like proteins. The other two (1cw0, the very short patch repair (Vsr) endonuclease (Tsutakawa et al., 1999; Bunting et al., 2003) and 4oq2, the 5hmC specific restriction endonuclease PvuRTs1I (Kazrani et al., 2014)) are grouped with DUF559 in the cl00277 superfamily of the CDD database. This superfamily corresponds more or less to the PE..(D/E)xK family of endonucleases, named after the catalytic residues (Knizewski et al., 2007). The models produced for the RAP domains (Fig S4) indeed show a mostly antiparallel  $\beta$ -sheet sandwiched between two  $\alpha$ -helices, similar to the  $\alpha\beta\beta\beta\alpha\beta$  topology of PE..(D/E)xK endonucleases. The catalytic residues of the endonucleases align reasonably well with residues that are well-conserved in an alignment of 640 RAP domains; Fig. S5). The RAP domain could have conserved the metal-dependent endonuclease function of its ancestors, with a specificity shifted towards RNA rather than DNA. Mechanistically, this is not unrealistic: the monomeric Vsr cleaves a single strand of the DNA, next to a T-G mismatch, while the others act as dimers to generate double stranded cuts. Interestingly, the sole OPR protein in *Arabidopsis*, required for the proper processing of *rrnS* precursor (Kleinknecht et al., 2014), also contains a RAP domain.

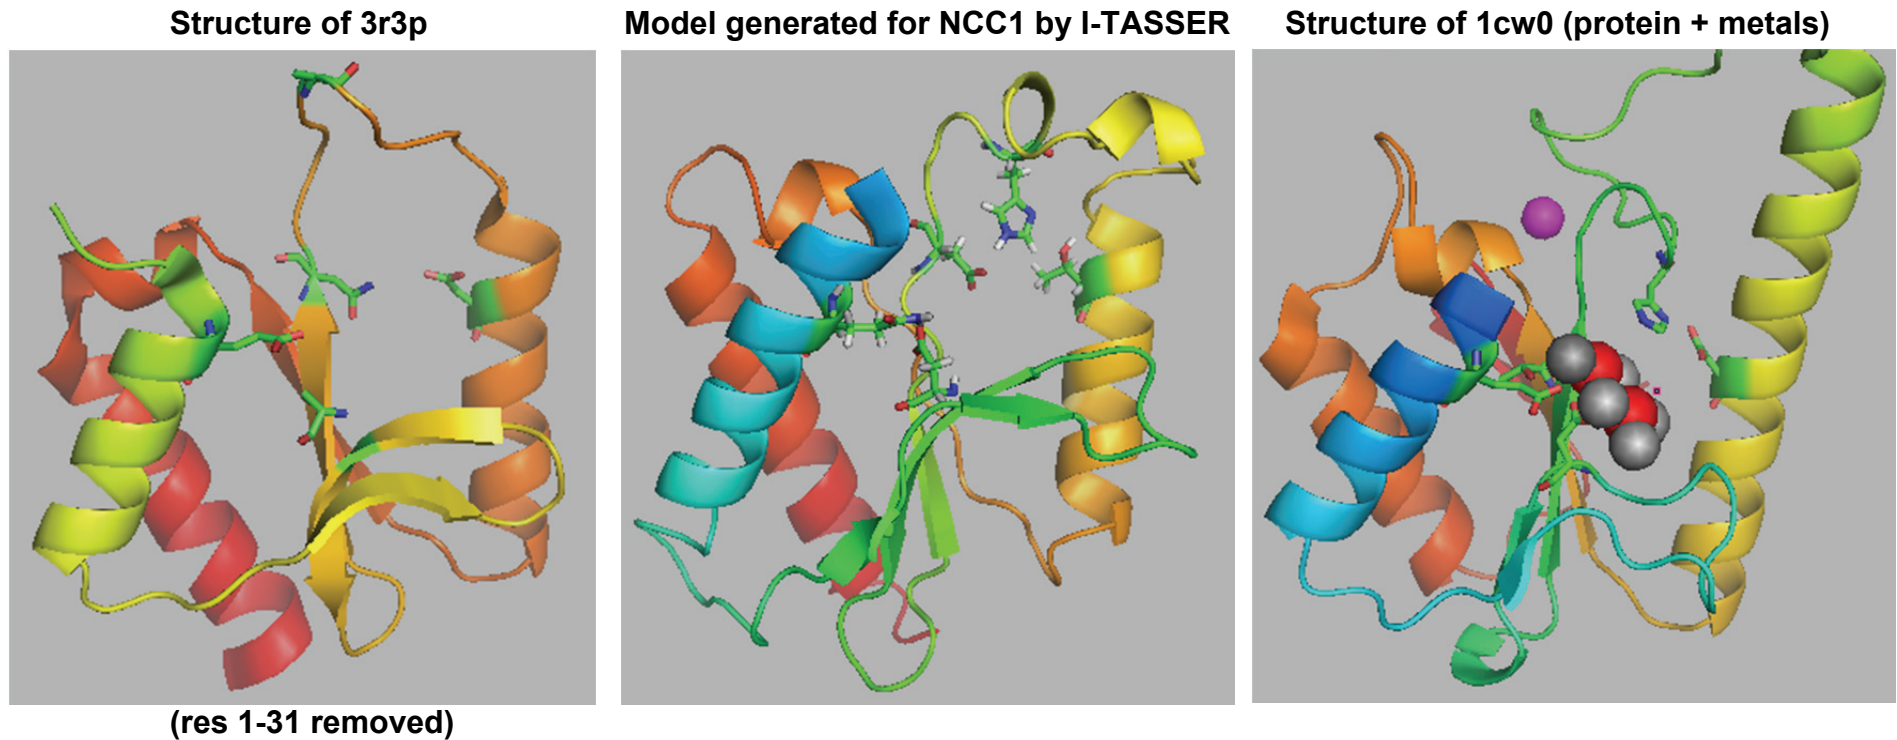

**Fig. S3: Comparison of NCC1 model with known structures of endonucleases**

Residues involved in catalysis (experimentally defined for 3r3p and 1cw0, predicted for the RAP domain) are shown in stick representation, colored by element. In 1cw0, the Zn atom is shown in magenta, the Mg atoms in red and their bonding water oxygen atoms in grey

**Similarity between the RAP domain and endonucleases.**

**Fig. S4: I-TASSER alignment used for threading of the NCC1 RAP domain.**

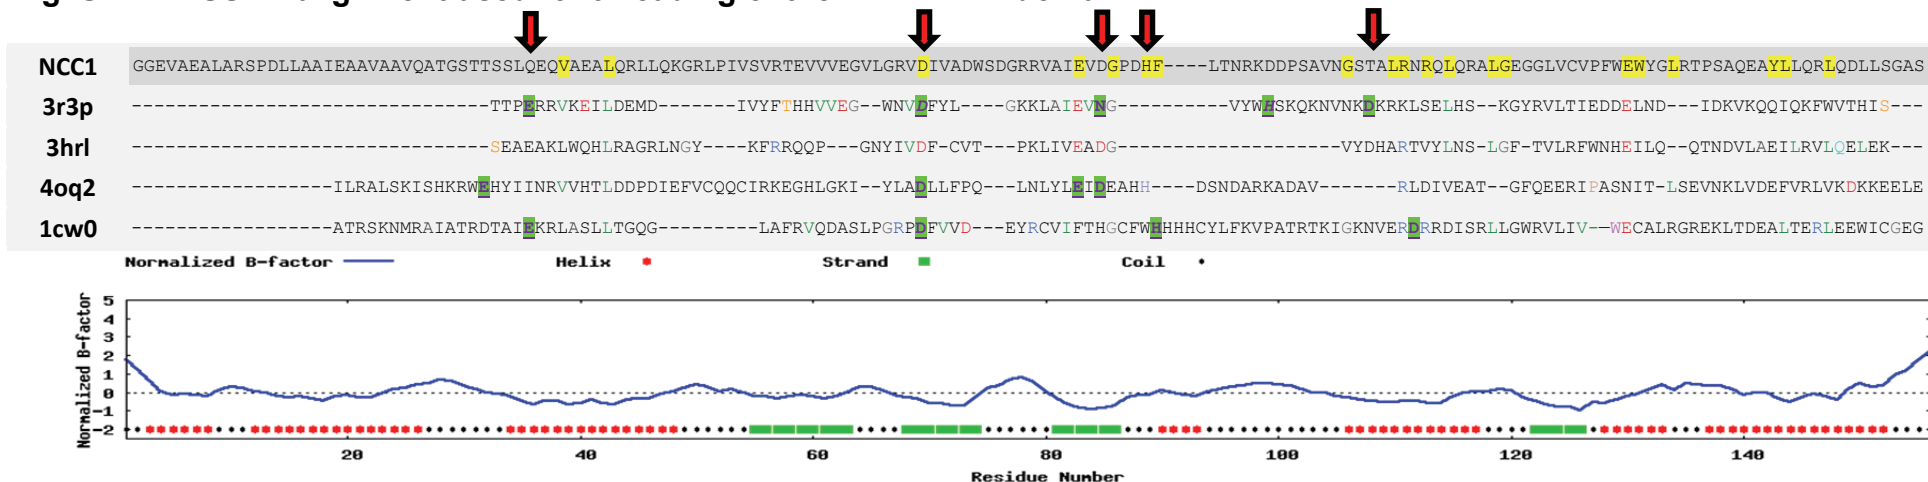

Residues highlighted in yellow correspond to those best conserved in an alignment of 640 RAP domains from Uniprot. Those highlighted in green have been identified as important for catalysis in the endonucleases (in 3r3p, italicized D196 and H213 have been mutated to A). In the template sequences, colored residues correspond to those also found in NCC1. Candidate active site residues in NCC1 are indicated by arrows. The normalized B-factor and predicted secondary structure are shown at the bottom.

3r3p: Homing Endonuclease I-Bth0305I Catalytic Domain (Taylor et al, 2011); 3hrl: putative endonuclease-like protein (ngo0050) from *Neisseria gonorrhoeae* (unpublished); 4oq2: 5hmC specific restriction endonuclease PvuRTs1I (Kazrani et al, 2014); 1cw0: Vsr endonuclease (Bunting et al, 2003; Tsutakawa et al, 1999)

**Best identified structural analogs in PDB:**

|      | PDB Hit | TM-score | RMSDa | IDENa | Cov.  |
|------|---------|----------|-------|-------|-------|
| NCC1 | 1cw0A   | 0.580    | 3.00  | 0.138 | 0.705 |

Ranking of proteins is based on TM-score of the structural alignment between the query structure and known structures in the PDB library. RMSDa is the RMSD between residues that are structurally aligned by TM-align. IDENa is the percentage sequence identity in the structurally aligned region. Cov. represents the coverage of the alignment by TM-align and is equal to the number of structurally aligned residues divided by length of the query protein.

**Supplemental Table 1: Genetic independence of the *ncc2* mutation from *MCA1* and *TCA1* genes.**

| A | Phenotype                    | Number of descendants |
|---|------------------------------|-----------------------|
|   | WT                           | 24                    |
|   | Leaky <i>b<sub>6</sub>f</i>  | 22                    |
|   | <i>b<sub>6</sub>f</i> mutant | 34                    |

  

| B | Tetrad type             | Number of tetrads |
|---|-------------------------|-------------------|
|   | Parental Ditype (PD)    | 4                 |
|   | Recombinant Ditype (RD) | 2                 |
|   | Tetratype (T)           | 5                 |

A. Analysis of descendant phenotypes for the cross *ncc2* x *mca1-2*

B. Analysis of tetrad types for the cross *ncc2* x *tca1-2*



**Supplemental Table 2: Markers designed to map the *ncc2* mutation on chromosome 15**

| marker | primers                                | position on chromosome 15                         | Ann. T. (°C) | elong. time (mn) | taille 137c (pbs) | taille S1-D2 (pbs)       |
|--------|----------------------------------------|---------------------------------------------------|--------------|------------------|-------------------|--------------------------|
| ZYS3   | F: AGCCGCCACGTGTTTGTGGAGG              | 225,954..225,975                                  | 58           | 2                | 350               | 500                      |
|        | R: ACTGCCTTCTGGCTCGTATGCGGG            | 226,281..226,304                                  |              |                  |                   |                          |
| 343    | F: CGGCCAGCCCACTACCTGC                 | 343,100..343,118                                  | 57           | 2                | 130               | 110                      |
|        | R: GCATATCTGCACATGCACATGTAC            | 343,213..343,236                                  |              |                  |                   |                          |
| 382    | F: CAGCTTCAGCCGCAGCAACAGCA             | 382,423..382,445                                  | 58           | 1                | 550               | 600                      |
|        | R: AAGGGACATGCATTCGCGCTCAGC            | 382,966..382,989                                  |              |                  |                   |                          |
| 425    | F: AGCAGGTGGGGTTTTCTAGGCGGCGTG         | 425,174..425,200                                  | 60           | 2                | 460               | several<br>smaller bands |
|        | R: GCGTACAGGTGAACAGCAGGGTGTGAT         | 425,622..425,648                                  |              |                  |                   |                          |
| 433    | F: CTCTGGCGCTGGCGGGGCATG               | 433,993..434,013                                  | 62           | 0.5              | 140               | 150                      |
|        | R: GCCCTCAAACTCGCGCAATGCCGA            | 434,104..434,127                                  |              |                  |                   |                          |
| 457    | F: AGGGTATGCCTTGATCGCACACATAC          | 457,538..457,563                                  | 60           | 0.5              | 120               | 90                       |
|        | R: CATGCCATGCTGCTGTACACCC              | 457,629..457,651                                  |              |                  |                   |                          |
| 467    | F: CTTGCGTGTGTTGCTGCCGACACCG           | 467,160..467,183                                  | 60           | 1                | 500               | -                        |
|        | R: CCGAGGCGGTGCAGGTGGGTG               | 472,764.. 472784 <sup>a</sup><br>476,779..476,799 |              |                  |                   |                          |
| 480    | F: ACCGAACCCTCCGGCTCCTCATCAACACC       | 480,488..480,516                                  | 60           | 0.5              | 250               | -                        |
|        | R: CCCGGCCGAGCGCTTCGGCGACCTCTTA        | 480,706..480,733                                  |              |                  |                   |                          |
| 497    | F: TCGCCC'TACCCCACTCCA                 | 497,948..497967 <sup>a</sup><br>501694..501,713   | 56           | 2                | 920               | 620                      |
|        | R1: TCACACCCATGCAATGACCTAG             | CACW27613.fwd .30..288 <sup>b</sup>               |              |                  |                   |                          |
|        | R2: CCCTAACTGAGCACATAAATTC             | 498,846..498,867                                  |              |                  |                   |                          |
| 509    | F: CACCAAATCCCGTTCGCACCTCCTC           | 509,758..509,776                                  | 55           | 0.67             | 320               | 120                      |
|        | R: ATGCGGCGCCCAACCGGAG                 | 509,758..509,776                                  |              |                  |                   |                          |
| 513    | F: AGTCGGGCAACTGCCGGAAG                | 513,236..513,256                                  | 55           | 0.67             | 290               | 150                      |
|        | R: AAGCTAAGCACTGATCAAACATCCACATTAACATG | 513,497..513,528                                  |              |                  |                   |                          |
| 531    | F1: ATAGGACCAGGCTTAGGGCCCT             | 531,550..531,571                                  | 55           | 0.67             | 390               | 220                      |
|        | F2: CGCGTACCGGCTGGAGGG                 | CACW4379.fwd 407..424 <sup>b</sup>                |              |                  |                   |                          |
|        | R: CTGCCACAATACCTGCCACAGCA             | 531,899..531,921                                  |              |                  |                   |                          |
| 576    | F: CGTTAAGGCGGCGGCTTACATCG             | 576,016..576,038                                  | 55           | 0.5              | 420               | 300                      |
|        | R: CGCGTCCAGGCGCTCATCCC                | 576,420..576,439                                  |              |                  |                   |                          |
| 623    | F: TACGCCCTCCAGCCCAAGTCCCTG            | 623,359..623,381                                  | 58           | 0.5              | 300               | -                        |
|        | R: TGGCGGCGGCTACGTAATGTAC              | 623,633..623,654                                  |              |                  |                   |                          |

Supplemental Data. Boulouis et al. (2015). Plant Cell 10.1105/tpc.15.00010

|      |     |                         |                                            |    |      |     |     |
|------|-----|-------------------------|--------------------------------------------|----|------|-----|-----|
| 1063 | F:  | GCCACGTTGCAACCTCGCTTG   | 1,063,557..1,063,577                       | 58 | 0.5  | 210 | 190 |
|      | R:  | ATGTGAGGGCGGCTGCGGG     | 1,063,557..1,063,577                       |    |      |     |     |
| 1114 | R:  | TCTGCTGCAATGCTGATGCC    | 1,114,852..1,114,871                       | 55 | 0.67 | 350 | 250 |
|      | F1: | TATGTTGCATTTACGACGGTGAG | 1,115,195..1,115,217                       |    |      |     |     |
|      | F2: | TGGCAGGGACAGCTGTGC      | CET1 178473 925063A1 315..298 <sup>b</sup> |    |      |     |     |

Columns describe, from left to right, the name of the marker, the sequence (5' to 3') of the corresponding oligonucleotides, their position on chromosome 15 or on S1-D2 ESTs, the annealing temperatures and elongation times used for PCR amplification and the size of the amplicons in *C. reinhardtii* 137c and in S1D2. - indicates that no PCR product could be amplified from S1D2 with the indicated pair of primers.

<sup>a</sup>: this oligonucleotide has multiple hits on the *Chlamydomonas* genome, but only that one gives rise to a detectable PCR amplification product under the experimental conditions used.

<sup>b</sup>: these oligonucleotides do not align along the *Chlamydomonas* genome but along EST from strain S1D2.

**Supplemental Table 3: Oligonucleotide used in this study**

| Name                               | Sequence 5' to 3' <sup>a</sup>                                    | Restriction sites <sup>b</sup> |
|------------------------------------|-------------------------------------------------------------------|--------------------------------|
| AFRF_FW                            | <b>CGCCCATGG</b> CTATGTCTAACCAAGTATTTACTACT                       | <b><i>NcoI</i></b>             |
| AFRF_RV                            | CGC <b>CTGCAG</b> TTAGAAGTTCATTTCTGCTAATTGAACT                    | <b><i>PstI</i></b>             |
| <i>atpA</i> <sub>Fus</sub> FW      | CGC <b>AAGCTT</b> CAATGCGTACTCCAGAAGAACT                          | <b><i>HindIII</i></b>          |
| <i>atpA</i> <sub>Fus</sub> RV1     | CGC <b>CTGCAG</b> ACCATCACCTAATAATACCGCA                          | <b><i>PstI</i></b>             |
| <i>atpA</i> <sub>Fus</sub> RV2     | GCT <b>CTGCAGTTA</b> AGCTGTCATACTACCTTCA                          | <b><i>PstI</i></b>             |
| <i>atpA</i> Cod                    | CAATGCGTACTCCAGAAGAACT                                            |                                |
| <i>ncc1</i> _FW                    | CGTTCATTCCGAGACACCTG                                              |                                |
| <i>ncc1</i> _RV                    | TGCGGCTACGGCTTTGGGTT                                              |                                |
| <i>ncc2</i> _FW                    | TATGACACCACAGGCACTCA                                              |                                |
| <i>ncc2</i> _RV                    | CCAGACCTTGCTCAGTCAGT                                              |                                |
| <i>atpA</i> <sup>M</sup> FW        | AACTCAGGTTTACGCCAGCG <b>GTTAAC</b> GTAGGTATTTTCAG                 | <b><i>HpaI</i></b>             |
| <i>atpA</i> <sup>M</sup> RV        | CTGAAATACCTAC <b>GTTAAC</b> CGCTGGGCGTAAACCTGAGTT                 | <b><i>HpaI</i></b>             |
| <i>atpA</i> <sub>Ext</sub> FW      | AGGTAGTATGACAGCTCTT <b>CAATTG</b> TTGAAACACAAGAAGGT               | <b><i>MfeI</i></b>             |
| <i>atpA</i> <sub>Ext</sub> RV      | TATACCGAGTTCCCTAC <b>TTAATTAAAA</b> TTAAGCAGCTTTAGCT              | <b><i>PacI</i></b>             |
| <i>petA</i> <sup>M</sup> FW        | ACAAAACCTACGCTAACCG <b>GGAGAAGCAAA</b> CGGTCGTATTGTATGTGCA        | <del><i>PmII</i></del>         |
| <i>petA</i> <sup>M</sup> RV        | TGCACATACAATACGACCG <b>TTTGCTT</b> TC <b>GGGG</b> TTAGCGTAGTTTTGT | <del><i>PmII</i></del>         |
| <i>petA</i> <sub>Ext</sub> FW      | TCCCCATTTTTATA <b>AGATCT</b> TCCATGCATGAACT                       | <b><i>BglII</i></b>            |
| <i>petA</i> <sub>Ext</sub> RV      | TGGGATTTTT <b>GTCTAC</b> AACAACCTTACCCTTTGCTTTT                   | <b><i>AclI</i></b>             |
| <i>petD5</i> ::T2_FW               | TAG <b>ATTTAAATCCACGTGAGGCTAATGG</b> TGTAATTCTGTCCCTTTTAC         | <b><i>SwaI, PmlI</i></b>       |
| <i>petD</i> <sub>Cod</sub> ::T2_RV | GGC <b>CTGCAGCCATTAGCCTCACGTGGA</b> AATACACCTAGAAGTTTGTGTTG       | <b><i>PstI, PmlI</i></b>       |

<sup>a</sup>: bases written in red differ from the wild type *Chlamydomonas* sequence

<sup>b</sup>: Restriction sites introduced in the sequence of the oligonucleotide for cloning purpose (written in bold) or for RFLP analysis of the transformants (written in black). The crossed-out restriction site points to a restriction site, originally present in the wild type *petA* sequence but destroyed in the transformant.

**Supplemental Table 4: NCC1 and NCC2 paralogous genes**

| E value (/NCC2)       | Score (/NCC2) | gene model         |               |                       |
|-----------------------|---------------|--------------------|---------------|-----------------------|
| 0.0                   | 1643.3        | NCC2               | 618.3         | 0.0                   |
| 0.0                   | 1102.8        | Cre15.g640450.t1.2 | 584.3         | 0.0                   |
| 0.0                   | 930.2         | Cre15.g640350.t1.2 | 584.3         | 0.0                   |
| 0.0                   | 818.5         | Cre15.g638450.t1.2 | 568.2         | 0.0                   |
| 0.0                   | 723.4         | Cre15.g639700.t1.1 | 676.4         | 0.0                   |
| 0.0                   | 722.6         | Cre15.g637850.t1.1 | 657.9         | 0.0                   |
| 0.0                   | 692.2         | Cre15.g639802.t1.1 | 609.4         | 0.0                   |
| 0.0                   | 690.3         | Cre15.g639750.t1.1 | 622.1         | 0.0                   |
| 0.0                   | 687.6         | TTT15.g639800.t1.1 | 608.6         | 0.0                   |
| 0.0                   | 666.8         | Cre15.g639850.t1.2 | 632.1         | 0.0                   |
| 0.0                   | 595.9         | Cre15.g638303.t1.1 | 1032.3        | 0.0                   |
| 0.0                   | 584.7         | Cre15.g638300.t1.1 | 969.1         | 0.0                   |
| 0.0                   | 578.6         | Cre19.g750697.t1.1 | 974.2         | 0.0                   |
| 0.0                   | 570.1         | Cre15.g638150.t1.1 | 932.9         | 0.0                   |
| 0.0                   | 567.4         | Cre15.g638100.t1.1 | 930.2         | 0.0                   |
| 0.0                   | 567.0         | Cre15.g638956.t1.1 | 954.9         | 0.0                   |
| 0.0                   | 565.1         | Cre19.g750497.t1.1 | 926.8         | 0.0                   |
| 0.0                   | 562.4         | Cre04.g223150.t1.1 | 1099.7        | 0.0                   |
| 0.0                   | 557.4         | Cre15.g638000.t1.1 | 984.6         | 0.0                   |
| 1.6 E <sup>-176</sup> | 550.8         | Cre15.g638954.t1.1 | 971.8         | 0.0                   |
| 4.5 E <sup>-180</sup> | 549.3         | Cre15.g638401.t1.1 | 913.7         | 0.0                   |
| 1.8 E <sup>-174</sup> | 534.6         | Cre15.g638304.t1.1 | 900.2         | 0.0                   |
| 6.2 E <sup>-172</sup> | 529.6         | Cre15.g638651.t1.1 | 993.4         | 0.0                   |
| 1.7 E <sup>-172</sup> | 528.1         | Cre15.g638700.t1.1 | 954.5         | 0.0                   |
| 5.5 E <sup>-171</sup> | 523.9         | Cre15.g638050.t1.1 | 1091.3        | 0.0                   |
| 3.4 E <sup>-168</sup> | 520.4         | Cre15.g638550.t1.1 | 902.1         | 0.0                   |
| 1.1 E <sup>-171</sup> | 518.9         | Cre15.g639650.t1.1 | 375.9         | 2.2 E <sup>-115</sup> |
| 3.8 E <sup>-165</sup> | 513.8         | Cre15.g639308.t1.2 | 906.7         | 0.0                   |
| 1.7 E <sup>-166</sup> | 513.5         | NCC1               | 1941.4        | 0.0                   |
| 1.1 E <sup>-163</sup> | 511.1         | Cre15.g639000.t1.2 | 1070.5        | 0.0                   |
| 5.7 E <sup>-163</sup> | 504.6         | Cre15.g639304.t1.2 | 825.5         | 0.0                   |
| 4.4 E <sup>-159</sup> | 492.7         | Cre17.g739800.t1.1 | 847.0         | 0.0                   |
| 1.7 E <sup>-154</sup> | 484.6         | Cre15.g638650.t1.1 | 1004.6        | 0.0                   |
| 2.8 E <sup>-151</sup> | 478.4         | Cre19.g750747.t1.1 | 900.6         | 0.0                   |
| 1.3 E <sup>-130</sup> | 406.4         | Cre06.g258051.t1.1 | 608.2         | 0.0                   |
| 5.1 E <sup>-118</sup> | 388.3         | Cre15.g638750.t1.2 | 745.7         | 0.0                   |
| 2.8 E <sup>-65</sup>  | 238.8         | Cre15.g634800.t1.1 | 224.9         | 3.3 E <sup>-60</sup>  |
| 5.6 E <sup>-25</sup>  | 108.6         | Cre15.g639300.t1.1 | 230.3         | 1.2 E <sup>-66</sup>  |
| 3.1 E <sup>-25</sup>  | 107.8         | Cre15.g639614.t1.2 | 136.3         | 1.5 E <sup>-34</sup>  |
|                       |               | gene model         | Score (/NCC1) | E value (/NCC1)       |

Gene models (v5.5 annotation) highly similar to either NCC1 or NCC2 are listed in the third column, with the score and E-value obtained in a search using NCC2 as a query shown in the first two columns and those obtained using NCC1 as a query indicated in the last two columns. Genes models located on chromosome 15 are written in black, those located on other chromosomes in Blue. Gene models written in red have a E-value higher than  $10^{-100}$ , but were nevertheless taken into consideration because they are embedded in the OPR cluster on chromosome 15 and have an E-value lower than  $10^{-100}$  with some NCC1/2 paralogs. The more divergent gene model written in green, ova\_1\_g13706.t1, is located on chromosome 15 but outside of the cluster and corresponds OPR protein most closely related to these paralogs. Called Chlre\_OPR68, it was used as an out-group to root the phylogenic tree in Fig. 5D.

## Supplemental Material and Methods

Sequence of the synthetic *NCC1<sup>M</sup>* and *NCC2<sup>M</sup>* tagged genes for complementation in *Chlamydomonas*

### *ncc1-HA*

GAATTCATGTTTACAGTTTCGCGCACGGCAGCGCAGTTGGCTTACGCAGAAGCTACAATGCTCCAGCATCAG  
CACACATAGGGCTCGAGCTTTGGCCATGCGGCATACGGCTGACCCAGCCTCGCGCCGCTCGGACCGCCGG  
GCGCCTCGGCCCTCGGCGACCGCCGGCCGTGTGGCCCGCGGCTGGCGTGCAGCTCCGCAACCAGCGGC  
CCGGCGGCGCAGTGTCTAGCGGCGGCGGCCCGCCCTTGGCCGCCACCGCACCTGCTGCCACAGGGGCTG  
GCGGCGGTCTGCGGCAGCTACTGCCGCTAGCCGCTTGGGCCGTCAGCCGCACCAGCGCCCGCCACTGC  
CGCACCTGCAGCAGCCGGGGCGCGCAGCTGTCTCCTGCAGCCGGGGCGGCGCGCAGCAGCAGGTGCTG  
GCGGCTGCAGGGAGGTACGGCAGTGGCGGCACCAGTACAGGAGCAGTGGCAGGAGCAGTGACAACAGCA  
GCAGCGGACATGGCGGCATCAGCGGCAGCCGAGTAGCAGTGACGGTGGCGGAAGGGCGGGCAGGGGCGAG  
GGCAGACGGAGGCCATTTGGCCCGGCGGCAGCGGGCGTGGCAGTGGAAAGGACGGGCGGTGGTGGTGGCAGG  
AGTGGTGGTGGCGGTAGGCCGCTGACCCCGAAGACGTGATGATCGGGTATGCGACTCTGGAGGAGCTGC  
AAGGAGTCATTTGATCAGCGGTGGCGGTGTGGTGGCAGCGGCAAGACGTGAGCACCATGTCAGCTGCCTT  
CGGCCGTTGTGGCAAGTTGGGAGGTTGGACTAGCTAGCGGGCAATAAGAAGAGGAGGGGCGAGGGGCGAGGG  
GTCGGGCTTGCTGCAAGCAGTGGCGGCCCTTCCGTCATTGCAGTGGCGGCACGTGACAACGCCAACAAACA  
CACGCACCTCCTTAGCACTTACCAAGCTCACACGGTACTGCTTAGGGATGCGTTGCATGATGACGGTGG  
GGCTGATCCAAGCTTGCTTTTTCACCGCCACAGTGAGTGATCGGGGCATCGTCCTTTCCCACGTGCCCCCC  
GCCCCCCCCGCCCCCCCCCTGCAGCTAGAGTCAGCACGCGCCGGCGGGGGGACCGCCACAGCCGCGGCC  
GTGCCAACATCATTGCGGCCCTTGGCCCTGCTCTCCTTCCGCTCGTCCCACGCATCCGGCAGCCGGCCGG  
CTGCAGCCTTCCGCTGTTGGCTCTGGCGAAGGCCGGGGCTGCCAGCGACGGGCGTGTGGAGTCACAGCTG  
GCGCCGGCACTGCTGCAGCGGTGGTGGATCCGGTGTGCTGGATAGTGGCACTCCCCAGGCCCTGGCGA  
ACTACTGTATGCTGCTGGGCAAGCTGCGGGAGGATCAGCAGCGCGGGGCTTGGGCTGGGATCCCACCTC  
ATCCGCATCTGAAAGCGCTGGCGAGCGCTGTGGCCTCGCGGCTGCGTGGCGGAGGGGGCAGCGGCTTC  
ACCGCCAGGCTGTTTCTAACAGCTGTGGGCTGCGCCAAGCTGGGGTACCGGACTCAGCACTCCTGC  
TGCCGCTGGCGGAGCGCGCCAGCCCTTGGCCCGGACATGAATGCGCAAGACCTGGCCAACAGCCTGTG  
GGCGCTGGAGGCTTTGGGCTGCACCAGACCGGAGTTTCGGGCAGTGTCTAAGGCGCTGTGCGGTGCGGCG  
CTGCGGCAGCTGCGAACCCCGAAGGAAGCTGCAGCGTTTCAATCCGAGACACCTGTCCAACATCTTGCTGG  
CGCTGGAGGGGCTGCAGCTGCGAGGCAAGCAGTCCGAGCTGCTGGCGTGGCTGTGGCTGCAGAGGGTGT  
GCGGCGGGGCTTTGCAGGCTTTAACC CGCAAGACCTCAGCAACTCGGCGTGGGCAETGGCCAAGATGGGG  
TATGGGGCTGGTGCACCGCCGCAAGCCATGGAGCAGAGCCATTTGGTATGCGGCCGCGGTGGCAGCAGCTC  
AGCGGCCCGGGTCAATGGCCGGCGCCAAGCCGAGGCTGGGCAACCTGCTGTACGCGCTTGCCTTGGT  
GCGCCACCAGCCACCGCCACGCTGCTTGACGCAGGCGCCGCGGCGGCGATGCAGGGAGGCAATGCACAG  
GAATGTTCAAACACGCTGTGGGCGCTGGCGTTGCTGCAGCTGCGGCATGCCGGCTTGGAGGCGGCGGTGT  
GCGGCCGCGCTGGGTGAGCTGCTGCGGCAAGGCCCGGAGTGCCTTATTGCACAGGAGCTTTGCAACAGCCT  
GTGGGCGCTGGCAGTGTGGCAGGCGGCGGTGGCCCTGCTAGCCCGGCTGCCGCTGCGATGGCCCCGGCG  
CTTGCCCGCAAGCCGCGCGGCGCCGTGAGGGGTTTCAGACCGAGGGGCTACTGCAGCTCTGGCAAGCGC  
AACATGAGCTGGGCGGCGAGGTGGCGGAGGCTCTTGGCCGACGCCCGGACCTGCTAGCCGCGATTGAGGC  
GGCGGTAGCTGCCGTACAGGCGACGGGGTCGACCACCAGCAGTCTGCAGGAGCAGGTGGCAGAGGGCGTT  
CAGCGACTGCTGCAGAAGGGTCGCTGCCATCGTTTCGGTGGGACGGAGGTGGTGGTGGAGGGCGTGC  
TGGGGCGTGTGGATATTGTGGCGGACTGGAGCGATGGGCGCAGAGTGGCAATCGAGGTGGACGGGCCAGA  
CCACTTCTCACCACCGGAAGGACGACCCGTCCGCGGTAACCGGATCCACGGCCCTACGTAACCGGCAG  
CTGCAGCGGGCGCTAGGCGAGGGAGGCTGGTGTGTGTGCCGTTCTGGGAGTGGTACGGTCTGAGGACGC  
CTTCCGCTCAGGAGGCCCTACCTGCTGCAGCGGCTGCAGGATCTGCTATCGGGCGCTTCGTCAGGAGCAGC  
AGGAGGGGGAGGCGAGCGCCGCGCCCTCGCCACCAGCAGCAGCGGACGACTCGGCTGCAGCCGGACATT  
GCCGGCAGCAGCACCACCAGCACCACCAGCACCCTAACAGCAGCCAGAAGAGGGCGGCTCCTCGTTGTCC  
GCAGAAAAGGCGCTGAAGCAGGAGGCGGCGGCGGCGGTGGGGCGGGAGGGGCTCGAATGCAACAGCAGC  
TGCAGCGACGGTAGCGGTTGCGGGGGCTGAGTCACTGGCCCCGCTGGCAGCAACCAGTGGAAAAGGCG  
CAGCGGCTTCCCAGCAGTGGCGCTGGTGGCGGTGCTGGCGAGGGCGGGGAAGACGGAGCTTCTCTGGCGC  
CGCAGCCTCCACCACCGCAGCAGCAGGAETGCTCAGCGCCCCGGGCGCGCCGAGCAGCAGCCAAACCCA  
AAGCCGTAGCCGAGTAGCGTGTATACATACCCCTACGACGTTCCGGACTACGCGTACCCGTACGATGTC  
CCCGACTACGCTAGCTACCCCTTATGATGTTCCCTGATTATGCTTGAAGATCT

**ncc2-HA**

GAATTCATGCGCACCAGCCGGCCGCTCTCAGCGCGTACAGCAACAGCAGGCATGGCTACGGCTATGGAT  
 CTGCAGCTGTCAGCCAGGGACCGCGCCCGGCGTACGCGGGCTGCTGCCGTGTTTCGCTCGGGCACTACGGT  
 GCCCAGGGCGTTTTCGAGCCGAGCTCGGCCACTCGGCCGACCTGTCCCTGCTGGAGTCGCGCAGCCTC  
 TCCCAACGGAGGGCTCTGTGCCGTCCGGTCTCGCTGGCAGCGGTGGCCGGCGCCCATCGCCCCGCGG  
 TCCCCCGCCTTCCAGCCGGCAGCTGGAGCAGGCGGCTGCTGGGGGGCGGGCGCCAGCAGCAGCAGCCG  
 TGGCGAAGGCCGATGGGCGGACGCGGCAGAGGGCGTGGTGGCTTCCGGGGCCGTGGAGGCACAGCTGCC  
 TCGGATGACGAAACGCTGGAGGAGCTGCAAGCGGGCGTGACTTGCCAGCTGCCGGGCTGGGTGGAGCGGG  
 AGGACAGCCGCCATCAGCAACGCCCTCCGCAAGGCCGTGCAGGTACGGTGCATCGTAGGAAGGCAACGC  
 CATGATTTGGCTTGTGGCCCTTATGCTTTCATAAATAAGCTCACCATGTACGTGCATGCCGCGCTACTCCT  
 TCCCACATGGAGTATCGCTCGGGCAATGGAGGCGCCGACGGCAGCTCGCATCCGCTCCGGCATCATTG  
 CTGACCTCTCAGCCGCTATCTGCCCTGGTGGCGCGCATTCGGAAGCCGTTTGACTGCCGCATGCCGCT  
 GTGGGCTTTGGGAAAAGGCTGGGATTGGCAGCAAGGGCCAGAGGTGCAGCTGGGCAATGCATTGTTGCAG  
 CGGCTGCTAGACCCGGCAGTCAATTGCCGGCGCAACCGCCATGGACCTGTCTCTTGGCGTTTACGCGCTGG  
 GCAAGCTGCGTGAAGGCTGGCAGCAGAACGGCGAAGGGTGGGATCAAAGCCTTGGCAAACCTGACGGATGC  
 AATAAAGACCAGGCTCACGGCGGCAGTCGGGCACGGCTTCAACGCGCAGGACGTGTCCAACAGCCTGTGG  
 GCGTGCGCCAAGCTGGGGCTCGCGGACGCGGACCTGCTGCAGCGACTTGCAGAGGCGGGCGGGCGGTTG  
 CTGGGGATATGACACCACAGGCACTCAGCAACAGCCTCTGGGCTCTCGAGGCTCTGGGGTGCACGGGGCC  
 AGCATAACGGGCGAGCGTTTTCAGTACTGTGCGGGGAGGCGCTGCGGGCGGCTCCGGACACCAAGCTCGCT  
 GAAGCATTCGAAGCCACAGGACTTGTGCAACATCCCTGCTGGCGCTGGAGGGGCTGCAGCTGGGCAGCGAGC  
 AGGCACAGTTGGTGTCCGCGGTGGCGGCAGAGGACGTGCGGGCGGGCTTCAAGGTACAACCTCTCAGGA  
 CATCGCAACTCCACCTGGGCCCTCGCCAAAATGGGGTTCGGCGTGGGCCCGGAGGCGCCGGCGGAGCAG  
 CGGCAGTGGGTACAGCAGCCCTGGACGCAGCTATGCGGCCAGGCACAATGGCGACAGCAACACCACAGA  
 ATTGGTCCAACCTGCTGTATGCGCTTTCGGTAATGCGCCACCAGCCGCGCCAGTACTGCTAGACGCGGG  
 TGCAGCGGCAGCCATGCGCGCCAACAGTGTCAATGGCCCGCAGGACTGCGCGAACACGCTGTACGCGCTG  
 GCGGTGCTGCAGCTGCGGCATGCCGGTTTGGAGGCGGGCGGTGTGCGGGCCGGCTGGGCGAGCTGCAGCAG  
 AAGATCTGGAGTCACTGACTGAGCAAGGCTTGGCAAACAGCCTATGGGCCGTGGCCGTGTTCCGGAGAAAC  
 CGGTCTCCGGCCATGCAACAGCTAGCAATGCAGCTGGCAGCGCAGCAATCCGTTGGGAGGAGTTT  
 GCCGACGAGGGCTTGCACAGTTGTGGCAGGCGCAGCAAGCCCTAGGCGGCGAGGTGGCGGGCGCCCTGC  
 GCGGCAACAGGAGTCTGCAGGCGGGCGATGGATAAGGCAGTGGCTACGTACCGGGAAGATACCAAGCACCT  
 GCCGGATGACCAGAAGCAGCTCCTCGCAGCGCTGCGGGCGGCTTGAGCAGCACGGGAGGGAGACAGCAGGA  
 GGCTTGGCGTCCAGCTGTGACAAACAGGCGTTGTTGCGCAAGGCGTGTGACCCCTGTGGATGCGGTGA  
 TGGGGCTGGTTGACGGGCGGCAGGTGGCAGTGGAGATGCTCGGACCGAAACGCTTTCATCTACAACCGTAA  
 GCAGGACGATCCACCCTGTGAAACGGCGGTACAGGCATGCGCAATCGGCAGCTGCGGGCGGGCGTTTAGC  
 GAGGGCGGCGTCTTGTGGTGGCGCACTGGGAGTGGGAGGGCCGTAAGAGCCCGGAGGAGCAGGAGGCCT  
 ACCTGCTGCTGCGGCTGCAGGAGGTGGCTGCGGCTGCAGAAACCAGGCGGGCGGGCAGCAGCTCAGGG  
 GGCAGGGAAGACCTCAGCTCGCACATCGGCGGCAGGCGGGCCGCTGCTCCTGCACCTGCACGCCCGGT  
 AGCAGCGGTAGCAGTAGCAGCCGCGGGCGGCTGGCGGGCAGTCCCTGGCAGCCCCAGCTGCTGACAC  
 GGCCCCCGGGCGGCGGTGTATACATACCCCTACGACGTTCCGGACTACGCGTACCCGTACGATGTCC  
 CGACTACGCTAGCTACCCCTATGATGTTCTGATTATGCTTGAAGGATCC

**Sequence of the synthetic *ncc1* and *ncc2* genes.**

Restriction sites introduced upstream and downstream of the coding sequence for cloning purposes are written in red; translation initiation and termination codons are boxed; intron sequences are written in purple. The sequence encoding the triple HA is written in blue, with an upstream BstZI restriction site introduced to delete the triple HA tag, if needed, underlined. Nucleotides written in red differ from the wild-type sequence and correspond either to the *ncc1* or *ncc2* mutations (boxed) or to silent mutations introduced to create new restriction sites (underlined), or to delete unwanted restriction sites (crossed out).

## **References for Supplemental Information:**

- Bunting, K.A., Roe, S.M., Headley, A., Brown, T., Savva, R., and Pearl, L.H.** (2003). Crystal structure of the Escherichia coli dcm very-short-patch DNA repair endonuclease bound to its reaction product-site in a DNA superhelix. *Nucleic Acids Res* **31**, 1633-1639.
- Emanuelsson, O., Nielsen, H., Brunak, S., and von Heijne, G.** (2001). Predicting subcellular localization of proteins based on their N- terminal amino acid sequence. *J.Mol.Biol.*2000.Jul.21;300(4):1005-16. **300**, 1005-1016.
- Horton, P., Park, K.J., Obayashi, T., Fujita, N., Harada, H., Adams-Collier, C.J., and Nakai, K.** (2007). WoLF PSORT: protein localization predictor. *Nucleic Acids Res* **35**, W585-587.
- Kazrani, A.A., Kowalska, M., Czapinska, H., and Bochtler, M.** (2014). Crystal structure of the 5hmC specific endonuclease PvuRts1I. *Nucleic Acids Res* **42**, 5929-5936.
- Kleinknecht, L., Wang, F., Stube, R., Philippar, K., Nickelsen, J., and Bohne, A.V.** (2014). RAP, the sole octotricopeptide repeat protein in Arabidopsis, is required for chloroplast 16S rRNA maturation. *Plant Cell* **26**, 777-787.
- Knizewski, L., Kinch, L.N., Grishin, N.V., Rychlewski, L., and Ginalski, K.** (2007). Realm of PD-(D/E)XK nuclease superfamily revisited: detection of novel families with modified transitive meta profile searches. *BMC structural biology* **7**, 40.
- Kuras, R., Saint-Marcoux, D., Wollman, F.A., and de Vitry, C.** (2007). A specific c-type cytochrome maturation system is required for oxygenic photosynthesis. *Proc Natl Acad Sci U S A* **104**, 9906-9910.
- Lemaire, C., and Wollman, F.A.** (1989). The chloroplast ATP synthase in Chlamydomonas reinhardtii. I. Characterization of its nine constitutive subunits. *Journal of Biological Chemistry* **264**, 10228-10234.
- Sievers, F., Wilm, A., Dineen, D., Gibson, T.J., Karplus, K., Li, W., Lopez, R., McWilliam, H., Remmert, M., Soding, J., Thompson, J.D., and Higgins, D.G.** (2011). Fast, scalable generation of high-quality protein multiple sequence alignments using Clustal Omega. *Molecular systems biology* **7**, 539.
- Small, I., Peeters, N., Legeai, F., and Lurin, C.** (2004). Predotar: A tool for rapidly screening proteomes for N-terminal targeting sequences. *Proteomics* **4**, 1581-1590.
- Tardif, M., Atteia, A., Specht, M., Cogne, G., Rolland, N., Brugiere, S., Hippler, M., Ferro, M., Bruley, C., Peltier, G., Vallon, O., and Cournac, L.** (2012). PredAlgo: a new subcellular localization prediction tool dedicated to green algae. *Mol Biol Evol* **29**, 3625-3639.
- Taylor, G.K., Heiter, D.F., Pietrokovski, S., and Stoddard, B.L.** (2011). Activity, specificity and structure of I-Bth0305I: a representative of a new homing endonuclease family. *Nucleic Acids Res* **39**, 9705-9719.
- Tsutakawa, S.E., Muto, T., Kawate, T., Jingami, H., Kunishima, N., Ariyoshi, M., Kohda, D., Nakagawa, M., and Morikawa, K.** (1999). Crystallographic and functional studies of very short patch repair endonuclease. *Mol Cell* **3**, 621-628.
- Zhang, Y.** (2008). I-TASSER server for protein 3D structure prediction. *BMC Bioinformatics* **9**, 40.
